# Supplementary material for: Role of the coupler to design organic magnetic molecules: LUMO plays an important role in magnetic exchange
Source: Royal Society of Chemistry journal article supplement (doi:10.1039/c5ra16670e), 2015-01-01
Supplement: c5ra16670e1.pdf [file c5ra16670e1.pdf]

# Role of Coupler to Design Organic Magnetic Molecules: LUMO Plays an Important Role in Magnetic Exchange

Suranjan Shil, Moumita Roy and Anirban Misra\*

Department of Chemistry, University of North Bengal, Raja Rammohunpur, Darjeeling 734013,  
West Bengal, India

Phone: +919434228745; Email: anirbanmisra@yahoo.com

**Table S1** UB3LYP Level Absolute Energies in a.u.,  $\langle S^2 \rangle$  and Intramolecular Exchange-Coupling Constant ( $J$  cm<sup>-1</sup>) Using 6-31+G(d) Basis Set, for the Diradicals (1–7)

| Diradical |   | Triplet               | BS          | $J$ (cm <sup>-1</sup> ) |       |
|-----------|---|-----------------------|-------------|-------------------------|-------|
| A         | 1 | E                     | -1606.00764 | -1606.00742             | 47.33 |
|           |   | $\langle S^2 \rangle$ | 2.14        | 1.12                    |       |
|           | 2 | E                     | -1606.01601 | -1606.01590             | 18.03 |
|           |   | $\langle S^2 \rangle$ | 2.13        | 1.12                    |       |
| B         | 3 | E                     | -1759.64745 | -1759.64715             | 63.31 |
|           |   | $\langle S^2 \rangle$ | 2.17        | 1.13                    |       |
|           | 4 | E                     | -1759.66004 | -1759.65996             | 17.38 |
|           |   | $\langle S^2 \rangle$ | 2.13        | 1.12                    |       |
|           | 5 | E                     | -1759.66331 | -1759.6623              | 17.56 |
|           |   | $\langle S^2 \rangle$ | 2.12        | 1.12                    |       |
|           | 6 | E                     | -1759.66342 | -1759.66336             | 13.16 |
|           |   | $\langle S^2 \rangle$ | 2.12        | 1.12                    |       |
|           | 7 | E                     | -1759.65373 | -1759.65365             | 13.04 |
|           |   | $\langle S^2 \rangle$ | 2.12        | 1.12                    |       |

**Table S2** UB3LYP Level Absolute Energies in a.u.,  $\langle S^2 \rangle$  and Intramolecular Exchange-Coupling Constant ( $J$  cm<sup>-1</sup>) Using 6-311++G(d,p) Basis Set, for the Diradicals (1–7)

| Diradical |   | Triplet               | BS          | $J(\text{cm}^{-1})$ |       |
|-----------|---|-----------------------|-------------|---------------------|-------|
| A         | 1 | E                     | -1606.37789 | -1606.37768         | 44.80 |
|           |   | $\langle S^2 \rangle$ | 2.14        | 1.12                |       |
|           | 2 | E                     | -1606.38629 | -1606.38619         | 23.26 |
|           |   | $\langle S^2 \rangle$ | 2.12        | 1.12                |       |
| B         | 3 | E                     | -1760.04736 | -1760.04709         | 57.43 |
|           |   | $\langle S^2 \rangle$ | 2.16        | 1.13                |       |
|           | 4 | E                     | -1760.06016 | -1760.06008         | 17.43 |
|           |   | $\langle S^2 \rangle$ | 2.13        | 1.12                |       |
|           | 5 | E                     | -1760.06368 | -1760.06359         | 18.06 |
|           |   | $\langle S^2 \rangle$ | 2.12        | 1.12                |       |
|           | 6 | E                     | -1760.06361 | -1760.06356         | 11.67 |
|           |   | $\langle S^2 \rangle$ | 2.12        | 1.12                |       |
|           | 7 | E                     | -1760.05408 | -1760.05401         | 13.39 |
|           |   | $\langle S^2 \rangle$ | 2.12        | 1.12                |       |

**Table S3** UBP86 Level Absolute Energies in a.u.,  $\langle S^2 \rangle$  and Intramolecular Exchange-Coupling Constant ( $J$  cm<sup>-1</sup>) Using 6-311++G(d,p) Basis Set, for the Diradicals (1–7)

| Diradical |   | Triplet               | BS          | $J(\text{cm}^{-1})$ |      |
|-----------|---|-----------------------|-------------|---------------------|------|
| A         | 1 | E                     | -1606.40114 | -1606.40111         | 7.68 |
|           |   | $\langle S^2 \rangle$ | 2.03        | 1.03                |      |
|           | 2 | E                     | -1606.40874 | -1606.40873         | 3.73 |
|           |   | $\langle S^2 \rangle$ | 2.03        | 1.03                |      |
| B         | 3 | E                     | -1760.07013 | -1760.07009         | 8.93 |
|           |   | $\langle S^2 \rangle$ | 2.04        | 1.03                |      |
|           | 4 | E                     | -1760.08143 | -1760.08142         | 2.79 |
|           |   | $\langle S^2 \rangle$ | 2.03        | 1.03                |      |
|           | 5 | E                     | -1760.08427 | -1760.08426         | 2.92 |
|           |   | $\langle S^2 \rangle$ | 2.03        | 1.03                |      |
|           | 6 | E                     | -1760.08453 | -1760.08452         | 1.80 |
|           |   | $\langle S^2 \rangle$ | 2.03        | 1.03                |      |
|           | 7 | E                     | -1760.07603 | -1760.07602         | 2.12 |

|  |                       |      |      |  |
|--|-----------------------|------|------|--|
|  | $\langle S^2 \rangle$ | 2.03 | 1.03 |  |
|--|-----------------------|------|------|--|

**Table S4** The Energy of SOMOs and LUMO in a.u. and Their Differences in eV at UB3LYP Level Using a 6-31+G(d) Basis set for the Diradicals

| Diradical |   | $E_{\text{SOMO1}}$ | $E_{\text{SOMO2}}$<br>( $E_{\text{HOMO}}$ ) | $E_{\text{LUMO}}$ | $\Delta E_{\text{SS}}(\text{eV})$ | $\Delta E_{\text{HL}}(\text{eV})$ |
|-----------|---|--------------------|---------------------------------------------|-------------------|-----------------------------------|-----------------------------------|
| A         | 1 | -0.19681           | -0.19679                                    | -0.08409          | 0.0                               | 3.07                              |
|           | 2 | -0.19724           | -0.19642                                    | -0.07040          | 0.02                              | 3.43                              |
| B         | 3 | -0.19724           | -0.19053                                    | -0.09462          | 0.18                              | 2.61                              |
|           | 4 | -0.19753           | -0.19667                                    | -0.08075          | 0.02                              | 3.15                              |
|           | 5 | -0.19758           | -0.19631                                    | -0.07155          | 0.02                              | 3.41                              |
|           | 6 | -0.19815           | -0.19689                                    | -0.07240          | 0.03                              | 3.39                              |
|           | 7 | -0.19667           | -0.19667                                    | -0.07552          | 0.0                               | 3.30                              |

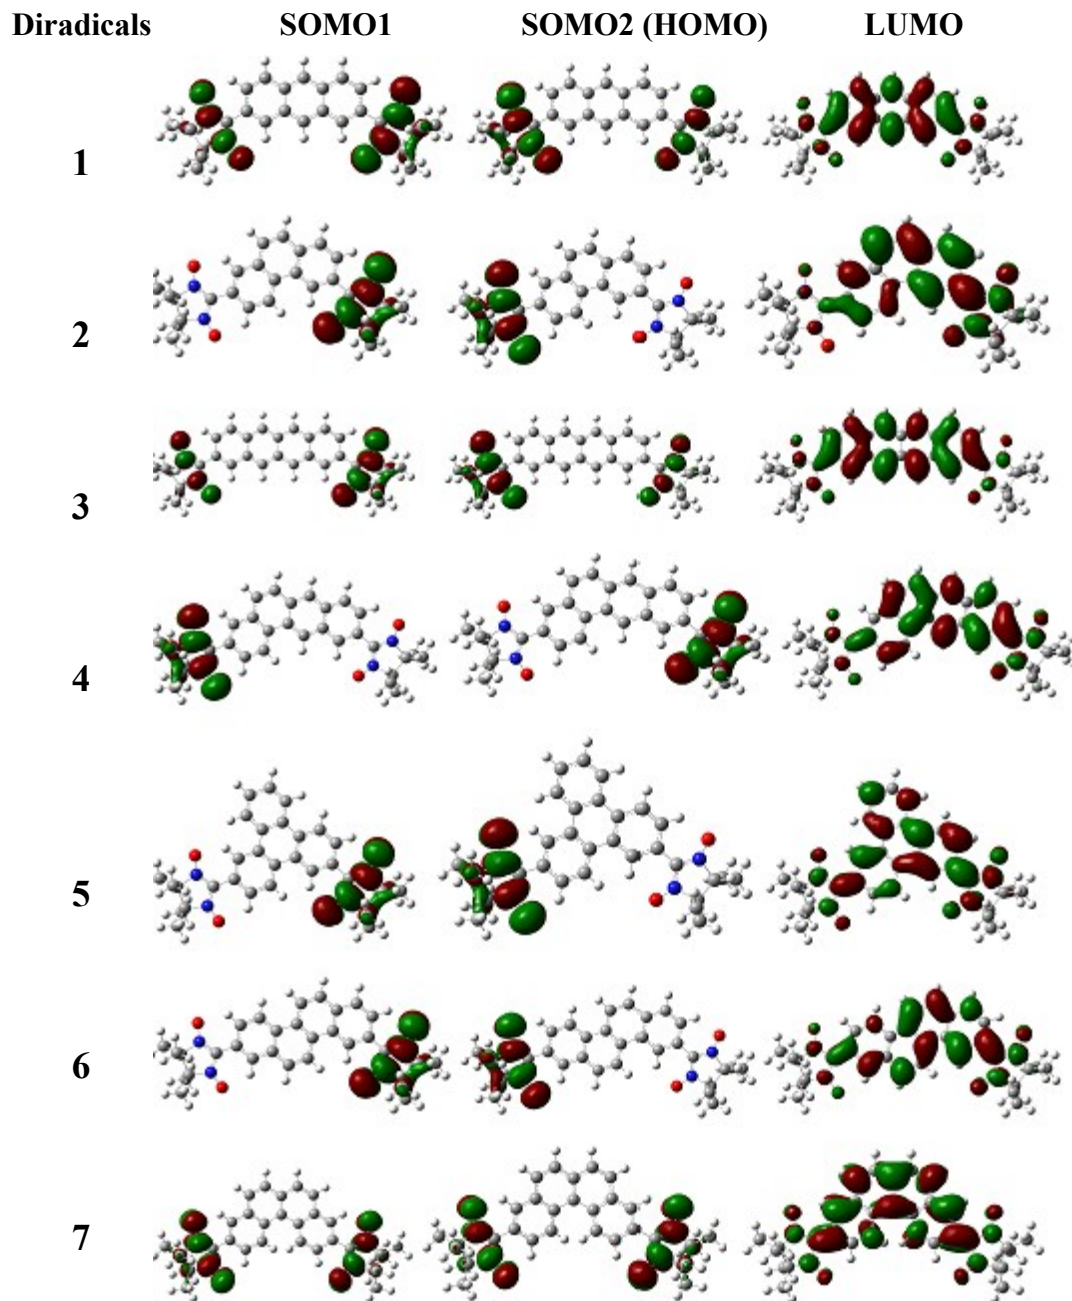

**Fig. S1** Spatial distribution of molecular orbitals (the green and violet colour represents the different phase of the orbital coefficients), the iso value is 0.02 (BP86/6-311++G(d,p)).

### Optimized Coordinate of the Polyacene Couplers (B3LYP/6-31+G(d,p))

#### Polyacene I

|   |            |             |             |
|---|------------|-------------|-------------|
| C | 0.00000000 | 3.66447000  | 0.71368900  |
| C | 0.00000000 | 2.48163400  | 1.40815300  |
| C | 0.00000000 | 1.22476200  | 0.72285600  |
| C | 0.00000000 | 1.22476200  | -0.72285600 |
| C | 0.00000000 | 2.48163400  | -1.40815300 |
| C | 0.00000000 | 3.66447000  | -0.71368900 |
| C | 0.00000000 | 0.00000000  | 1.40478300  |
| C | 0.00000000 | 0.00000000  | -1.40478300 |
| C | 0.00000000 | -1.22476200 | -0.72285600 |
| C | 0.00000000 | -1.22476200 | 0.72285600  |
| C | 0.00000000 | -2.48163400 | 1.40815300  |
| H | 0.00000000 | -2.48052600 | 2.49519500  |
| C | 0.00000000 | -3.66447000 | 0.71368900  |
| C | 0.00000000 | -3.66447000 | -0.71368900 |
| C | 0.00000000 | -2.48163400 | -1.40815300 |
| H | 0.00000000 | 0.00000000  | 2.49266600  |
| H | 0.00000000 | 4.61014400  | 1.24796500  |
| H | 0.00000000 | 2.48052600  | 2.49519500  |
| H | 0.00000000 | 2.48052600  | -2.49519500 |
| H | 0.00000000 | 4.61014400  | -1.24796500 |
| H | 0.00000000 | 0.00000000  | -2.49266600 |
| H | 0.00000000 | -4.61014400 | 1.24796500  |
| H | 0.00000000 | -4.61014400 | -1.24796500 |
| H | 0.00000000 | -2.48052600 | -2.49519500 |

#### Polyacene II

|   |            |            |             |
|---|------------|------------|-------------|
| C | 0.00000000 | 3.56481300 | -0.29758600 |
| C | 0.00000000 | 2.84003700 | 0.87943900  |
| C | 0.00000000 | 1.42416200 | 0.86727800  |
| C | 0.00000000 | 0.72936100 | -0.38010100 |
| C | 0.00000000 | 1.50040200 | -1.56771300 |
| C | 0.00000000 | 2.88467300 | -1.53144100 |
| H | 0.00000000 | 1.23151200 | 3.03306200  |

|   |            |             |             |
|---|------------|-------------|-------------|
| H | 0.00000000 | 4.65052900  | -0.27301500 |
| H | 0.00000000 | 3.35212400  | 1.83842300  |
| C | 0.00000000 | 0.68067400  | 2.09603800  |
| C | 0.00000000 | -0.72936100 | -0.38010100 |
| H | 0.00000000 | 1.00748000  | -2.53334400 |
| H | 0.00000000 | 3.44714300  | -2.46061000 |
| C | 0.00000000 | -1.42416200 | 0.86727800  |
| C | 0.00000000 | -0.68067400 | 2.09603800  |
| H | 0.00000000 | -1.23151200 | 3.03306200  |
| C | 0.00000000 | -2.84003700 | 0.87943900  |
| C | 0.00000000 | -3.56481300 | -0.29758600 |
| H | 0.00000000 | -4.65052900 | -0.27301500 |
| C | 0.00000000 | -2.88467300 | -1.53144100 |
| H | 0.00000000 | -3.44714300 | -2.46061000 |
| C | 0.00000000 | -1.50040200 | -1.56771300 |
| H | 0.00000000 | -1.00748000 | -2.53334400 |
| H | 0.00000000 | -3.35212400 | 1.83842300  |

### Polyacene III

|   |             |             |            |
|---|-------------|-------------|------------|
| C | 1.23646200  | -1.40762700 | 0.00000000 |
| C | 0.00000600  | -0.72662400 | 0.00000000 |
| C | 0.00000000  | 0.72661500  | 0.00000000 |
| C | 1.23643800  | 1.40763700  | 0.00000000 |
| C | 2.45277500  | 0.72641900  | 0.00000000 |
| C | -1.23646600 | -1.40764700 | 0.00000000 |
| C | -1.23648000 | 1.40762800  | 0.00000000 |
| C | -2.45276700 | 0.72637600  | 0.00000000 |
| C | -2.45275800 | -0.72640600 | 0.00000000 |
| C | -3.71473100 | -1.41060100 | 0.00000000 |
| H | -3.71344700 | -2.49765900 | 0.00000000 |
| C | -4.89428000 | -0.71610700 | 0.00000000 |
| C | -4.89428900 | 0.71604600  | 0.00000000 |
| C | -3.71474700 | 1.41055400  | 0.00000000 |
| H | -1.23652400 | -2.49549400 | 0.00000000 |
| H | 1.23653800  | -2.49547700 | 0.00000000 |
| H | 1.23652200  | 2.49548500  | 0.00000000 |
| H | -1.23655700 | 2.49547500  | 0.00000000 |
| H | -5.84110000 | -1.24831000 | 0.00000000 |
| H | -5.84111400 | 1.24823900  | 0.00000000 |
| H | -3.71348100 | 2.49761200  | 0.00000000 |
| C | 3.71470700  | 1.41058100  | 0.00000000 |
| C | 4.89430100  | 0.71609400  | 0.00000000 |
| H | 5.84107700  | 1.24837200  | 0.00000000 |

|   |            |             |            |
|---|------------|-------------|------------|
| C | 4.89431200 | -0.71601600 | 0.00000000 |
| H | 5.84109900 | -1.24827400 | 0.00000000 |
| C | 3.71473700 | -1.41052700 | 0.00000000 |
| H | 3.71353400 | -2.49758900 | 0.00000000 |
| H | 3.71348100 | 2.49764100  | 0.00000000 |
| C | 2.45277600 | -0.72639800 | 0.00000000 |

#### Polyacene IV

|   |             |             |            |
|---|-------------|-------------|------------|
| C | -0.84735800 | -4.68715300 | 0.00000000 |
| C | 0.29838100  | -3.92796100 | 0.00000000 |
| C | 0.23041300  | -2.50190100 | 0.00000000 |
| C | -1.06089400 | -1.86754000 | 0.00000000 |
| C | -2.22828400 | -2.68952300 | 0.00000000 |
| C | -2.12607800 | -4.06032700 | 0.00000000 |
| C | 1.37595900  | -1.68656000 | 0.00000000 |
| C | -1.13559100 | -0.46034500 | 0.00000000 |
| C | 0.00000000  | 0.34914900  | 0.00000000 |
| C | 1.29273300  | -0.29370700 | 0.00000000 |
| C | 2.48603400  | 0.51524600  | 0.00000000 |
| H | 3.44826600  | 0.01005300  | 0.00000000 |
| C | 2.41945000  | 1.87116000  | 0.00000000 |
| C | -0.06168100 | 1.81450100  | 0.00000000 |
| H | 2.35763800  | -2.15519200 | 0.00000000 |
| H | -0.78286900 | -5.77131100 | 0.00000000 |
| H | 1.27556600  | -4.40408600 | 0.00000000 |
| H | -3.20418200 | -2.21065100 | 0.00000000 |
| H | -3.02249100 | -4.67349300 | 0.00000000 |
| H | -2.12490000 | -0.01466900 | 0.00000000 |
| H | 3.32841300  | 2.46704600  | 0.00000000 |
| C | -1.27901400 | 2.53127800  | 0.00000000 |
| C | -1.30415000 | 3.91854800  | 0.00000000 |
| H | -2.25744800 | 4.43890600  | 0.00000000 |
| C | -0.10328600 | 4.64976200  | 0.00000000 |
| H | -0.12398800 | 5.73549400  | 0.00000000 |
| C | 1.10537500  | 3.97333400  | 0.00000000 |
| H | 2.04142200  | 4.52608000  | 0.00000000 |
| H | -2.22263900 | 1.99741200  | 0.00000000 |
| C | 1.15252600  | 2.56110600  | 0.00000000 |

#### Polyacene V

|   |            |             |            |
|---|------------|-------------|------------|
| C | 3.52776100 | -0.00000100 | 0.00036500 |
| C | 2.83586500 | -1.21185400 | 0.00030500 |

|   |             |             |             |
|---|-------------|-------------|-------------|
| C | 1.43042600  | -1.23713900 | 0.00015900  |
| C | 0.71401700  | 0.00000000  | 0.00007300  |
| C | 1.43042700  | 1.23713900  | 0.00013500  |
| C | 2.83586500  | 1.21185400  | 0.00028100  |
| C | 0.68160300  | -2.46595700 | 0.00009200  |
| C | -0.71401700 | 0.00000000  | -0.00007400 |
| C | -1.43042600 | -1.23713900 | -0.00013600 |
| C | -0.68160400 | -2.46595700 | -0.00004800 |
| C | -2.83586500 | -1.21185400 | -0.00028100 |
| H | -3.38274200 | -2.15118500 | -0.00032800 |
| C | -3.52776100 | 0.00000000  | -0.00036300 |
| C | -2.83586400 | 1.21185400  | -0.00030300 |
| C | -1.43042700 | 1.23714000  | -0.00015900 |
| C | -0.68160200 | 2.46595800  | -0.00009400 |
| C | 0.68160300  | 2.46595800  | 0.00004600  |
| H | 1.23024600  | 3.40435600  | 0.00009200  |
| H | -1.23024500 | 3.40435600  | -0.00015900 |
| H | 1.23024400  | -3.40435600 | 0.00015800  |
| H | 4.61395300  | 0.00000000  | 0.00047800  |
| H | 3.38274200  | -2.15118500 | 0.00037200  |
| H | 3.38274400  | 2.15118400  | 0.00032900  |
| H | -1.23024600 | -3.40435500 | -0.00009600 |
| H | -4.61395300 | 0.00000100  | -0.00047400 |
| H | -3.38274300 | 2.15118500  | -0.00036800 |

### Polyacene VI

|   |             |             |            |
|---|-------------|-------------|------------|
| C | -3.76460900 | 2.77788500  | 0.00000000 |
| C | -3.72358500 | 1.39812500  | 0.00000000 |
| C | -2.48738800 | 0.70384900  | 0.00000000 |
| C | -1.26003500 | 1.43509100  | 0.00000000 |
| C | -1.33941600 | 2.85245100  | 0.00000000 |
| C | -2.55718400 | 3.50818500  | 0.00000000 |
| C | -2.44419400 | -0.72361300 | 0.00000000 |
| C | 0.00000000  | 0.70936800  | 0.00000000 |
| C | -0.00001500 | -0.70944700 | 0.00000000 |
| C | -1.25635400 | -1.39711600 | 0.00000000 |
| C | 1.25996500  | -1.43511100 | 0.00000000 |
| C | 2.48734000  | -0.70380700 | 0.00000000 |
| C | 2.44410500  | 0.72357400  | 0.00000000 |
| C | 1.25619000  | 1.39706700  | 0.00000000 |
| H | -3.38232500 | -1.27262900 | 0.00000000 |
| H | -4.71706500 | 3.29964900  | 0.00000000 |
| H | -4.64417100 | 0.81984700  | 0.00000000 |
| H | -2.58213700 | 4.59409300  | 0.00000000 |



|   |             |             |            |
|---|-------------|-------------|------------|
| H | -1.27502300 | -2.48012900 | 0.00000000 |
| H | 3.38217100  | 1.27270200  | 0.00000000 |
| C | 3.72360900  | -1.39806900 | 0.00000000 |
| C | 3.76472200  | -2.77776700 | 0.00000000 |
| H | 4.71718100  | -3.29952600 | 0.00000000 |
| C | 2.55729400  | -3.50816000 | 0.00000000 |
| H | 2.58237500  | -4.59406500 | 0.00000000 |
| C | 1.33952700  | -2.85254000 | 0.00000000 |
| H | 0.43464000  | -3.44864000 | 0.00000000 |
| H | 1.27487000  | 2.48009300  | 0.00000000 |
| H | 4.64412800  | -0.81968100 | 0.00000000 |
| H | -0.43447500 | 3.44848600  | 0.00000000 |

### Polyacene VII

|   |             |             |             |
|---|-------------|-------------|-------------|
| C | -3.99054600 | -1.44742100 | -0.00001500 |
| C | -3.80770600 | -0.08214300 | 0.00003100  |
| C | -2.51355100 | 0.49900700  | 0.00002800  |
| C | -1.32401100 | -0.31796100 | -0.00001000 |
| C | -1.57668600 | -1.72135500 | -0.00007400 |
| C | -2.84928100 | -2.26744600 | -0.00007400 |
| H | -3.34201200 | 2.50420400  | 0.00007700  |
| H | -4.98686800 | -1.87848600 | -0.00001500 |
| H | -4.66417200 | 0.58692300  | 0.00006600  |
| C | -2.42518900 | 1.92149300  | 0.00005200  |
| C | 0.00000000  | 0.33625700  | 0.00000000  |
| H | -0.77621100 | -2.43347400 | -0.00013700 |
| H | -2.95533700 | -3.34840200 | -0.00012500 |
| C | 0.00000000  | 1.76393700  | 0.00000000  |
| C | -1.21017400 | 2.52575700  | 0.00002900  |
| H | -1.13057500 | 3.60907000  | 0.00003500  |
| C | 1.21017400  | 2.52575700  | -0.00002800 |
| C | 2.42518900  | 1.92149300  | -0.00005200 |
| C | 2.51355100  | 0.49900700  | -0.00002800 |
| C | 1.32401100  | -0.31796100 | 0.00001000  |
| C | 1.57668600  | -1.72135500 | 0.00007300  |
| C | 2.84928100  | -2.26744600 | 0.00007400  |
| C | 3.99054600  | -1.44742100 | 0.00001500  |
| C | 3.80770600  | -0.08214300 | -0.00003100 |
| H | 2.95533700  | -3.34840200 | 0.00012500  |
| H | 0.77621100  | -2.43347400 | 0.00013700  |
| H | 4.66417200  | 0.58692300  | -0.00006500 |
| H | 4.98686800  | -1.87848600 | 0.00001500  |
| H | 1.13057500  | 3.60907000  | -0.00003500 |
| H | 3.34201200  | 2.50420400  | -0.00007700 |

# Optimized Coordinate of the Diradicals

## B3LYP/6-31+G(d,p)

### Diradical 1

|   |             |             |             |
|---|-------------|-------------|-------------|
| C | -3.66685400 | 2.22150100  | 0.00447900  |
| C | -1.22436700 | 0.80133800  | 0.00154500  |
| C | -1.22233600 | 2.24477800  | -0.00068400 |
| C | -2.48599100 | 2.91275000  | -0.00373500 |
| C | -3.67753900 | 0.77865600  | 0.01046100  |
| C | -2.46591500 | 0.10115300  | 0.00327800  |
| H | -4.60927300 | 2.75131300  | 0.01853000  |
| H | -2.50038200 | 4.00038700  | -0.00903600 |
| C | -4.94276400 | 0.04676700  | 0.00872000  |
| H | -2.45334500 | -0.98078800 | -0.01381500 |
| N | -5.09256400 | -1.29157400 | -0.20761400 |
| N | -6.18304800 | 0.58040000  | 0.21693900  |
| C | -7.27926600 | -0.40784700 | -0.09386700 |
| C | -6.50306800 | -1.75362400 | 0.05848400  |
| O | -4.17403800 | -2.14492400 | -0.46372500 |
| O | -6.47176700 | 1.79178000  | 0.50926300  |
| C | -7.73742300 | -0.10677300 | -1.53416600 |
| C | -8.44641000 | -0.21252900 | 0.87410900  |
| C | -6.51084700 | -2.32277800 | 1.49039200  |
| C | -6.88795000 | -2.84751700 | -0.93781000 |
| H | -6.92444900 | -0.23137000 | -2.25643600 |
| H | -8.56374600 | -0.76421700 | -1.82297800 |
| H | -8.08544000 | 0.92932000  | -1.58328400 |
| H | -8.89528400 | 0.77082800  | 0.71540900  |
| H | -9.20951000 | -0.97685400 | 0.68891800  |
| H | -8.13491700 | -0.27340600 | 1.91914200  |
| H | -6.23099900 | -1.56867300 | 2.23288600  |
| H | -7.50143800 | -2.71215800 | 1.74616700  |
| H | -5.79011200 | -3.14390600 | 1.54713900  |
| H | -6.26212000 | -3.72834600 | -0.77643300 |
| H | -7.93503400 | -3.13232800 | -0.78537100 |
| H | -6.75800900 | -2.52962800 | -1.97456400 |
| C | -0.00000600 | 2.92957900  | -0.00011800 |
| C | 1.22232500  | 2.24477900  | 0.00048300  |

|   |             |             |             |
|---|-------------|-------------|-------------|
| C | 1.22435900  | 0.80133900  | -0.00168300 |
| C | -0.00000400 | 0.11549300  | -0.00005700 |
| C | 2.46590600  | 0.10115300  | -0.00337300 |
| C | 3.66684400  | 2.22150100  | -0.00464100 |
| C | 2.48598000  | 2.91274900  | 0.00351600  |
| H | 2.45333800  | -0.98078700 | 0.01375100  |
| H | 2.50037200  | 4.00038600  | 0.00876400  |
| H | -0.00000600 | 4.01812700  | -0.00014200 |
| H | -0.00000300 | -0.97249600 | -0.00003500 |
| C | 3.67753500  | 0.77865400  | -0.01055500 |
| C | 4.94276100  | 0.04676600  | -0.00874300 |
| N | 6.18308100  | 0.58043000  | -0.21668600 |
| N | 5.09253500  | -1.29160900 | 0.20740800  |
| C | 6.50308400  | -1.75361600 | -0.05853100 |
| C | 7.27925100  | -0.40786000 | 0.09414300  |
| O | 6.47185700  | 1.79185600  | -0.50876500 |
| O | 4.17397600  | -2.14500900 | 0.46323600  |
| C | 8.44654800  | -0.21239100 | -0.87362000 |
| C | 7.73718500  | -0.10700100 | 1.53456000  |
| C | 6.51110400  | -2.32255300 | -1.49052300 |
| C | 6.88781000  | -2.84765500 | 0.93766100  |
| H | 8.13522100  | -0.27311400 | -1.91871100 |
| H | 8.89538900  | 0.77094600  | -0.71470400 |
| H | 9.20962400  | -0.97673800 | -0.68842200 |
| H | 8.56346800  | -0.76448400 | 1.82339700  |
| H | 8.08518500  | 0.92908700  | 1.58388800  |
| H | 6.92410000  | -0.23171500 | 2.25668600  |
| H | 6.23133900  | -1.56834700 | -2.23294400 |
| H | 7.50175200  | -2.71185000 | -1.74620400 |
| H | 5.79041300  | -3.14370400 | -1.54750700 |
| H | 6.26198400  | -3.72844800 | 0.77607500  |
| H | 7.93490900  | -3.13246700 | 0.78532400  |
| H | 6.75773500  | -2.52991100 | 1.97444300  |
| H | 4.60926200  | 2.75131300  | -0.01868700 |

### Diradical 2

|   |            |            |             |
|---|------------|------------|-------------|
| C | 3.70858700 | 2.45195300 | -0.04179600 |
|---|------------|------------|-------------|

|   |             |             |             |
|---|-------------|-------------|-------------|
| C | 2.64934000  | 3.33389500  | -0.05939100 |
| C | 1.30633000  | 2.88981000  | -0.05214400 |
| C | 1.04648800  | 1.48751600  | -0.03478100 |
| C | 2.13858200  | 0.59566600  | -0.02092800 |
| C | 3.46419500  | 1.04832600  | -0.02049800 |
| H | 0.43899800  | 4.88388700  | -0.07287500 |
| H | 4.72618000  | 2.81632600  | -0.03222800 |
| H | 2.84568500  | 4.40371700  | -0.07433700 |
| C | 0.21408900  | 3.81986300  | -0.05961500 |
| C | -0.33511900 | 1.02287800  | -0.03239400 |
| H | 1.96739700  | -0.46952900 | -0.01965600 |
| C | -1.39003200 | 1.98148500  | -0.03360300 |
| C | -1.07697900 | 3.38509000  | -0.04830000 |
| H | -1.89991600 | 4.09592900  | -0.05222900 |
| C | -2.73680500 | 1.56127400  | -0.02444900 |
| C | -3.07734100 | 0.20413000  | -0.01623700 |
| C | -2.01934800 | -0.75044800 | -0.02193000 |
| H | -2.25729800 | -1.80463500 | -0.01404900 |
| C | -0.69963300 | -0.34374800 | -0.02969600 |
| H | 0.06640200  | -1.11182800 | -0.03495600 |
| H | -3.51808900 | 2.30949800  | -0.03047000 |
| C | -6.41634900 | -1.59609300 | -0.18673200 |
| C | -6.84810100 | -0.15582400 | 0.22700900  |
| C | 6.78432000  | -0.79076000 | -0.10434900 |
| C | 5.77980700  | -1.95433100 | 0.16204500  |
| C | -4.47695900 | -0.22232100 | -0.00366500 |
| C | 4.57355200  | 0.09436800  | -0.00078000 |
| N | 5.89632600  | 0.40291900  | 0.14422900  |
| N | 4.47144500  | -1.26086400 | -0.12267400 |
| N | -5.56658500 | 0.59907800  | -0.02269900 |
| N | -4.92637000 | -1.51203600 | 0.03221500  |
| O | -4.22744600 | -2.58182800 | 0.08769100  |
| O | -5.57834900 | 1.87746100  | -0.08121200 |
| O | 6.41220200  | 1.55941600  | 0.32510300  |
| O | 3.40802100  | -1.95064800 | -0.30304500 |
| C | -6.61826500 | -1.90407900 | -1.68306600 |
| H | -6.11253700 | -2.84451500 | -1.92100200 |
| H | -7.68267400 | -2.01328100 | -1.91452300 |
| H | -6.20164900 | -1.11859000 | -2.32148900 |
| C | -7.98060200 | 0.45218100  | -0.60105800 |
| H | -8.89208600 | -0.14162600 | -0.46932800 |
| H | -8.17862400 | 1.47116800  | -0.26043900 |
| H | -7.74084300 | 0.49541100  | -1.66575900 |
| C | -7.00398400 | -2.72509700 | 0.66033700  |
| H | -8.09406100 | -2.73840600 | 0.54986000  |
| H | -6.60919100 | -3.68458300 | 0.31815800  |

|   |             |             |             |
|---|-------------|-------------|-------------|
| H | -6.75987600 | -2.62092300 | 1.71979600  |
| C | -7.15562700 | 0.00084300  | 1.72898700  |
| H | -7.24206100 | 1.06654800  | 1.96067900  |
| H | -8.10170300 | -0.48745500 | 1.98405600  |
| H | -6.36457400 | -0.42375200 | 2.35520100  |
| C | 5.93215400  | -3.17306300 | -0.74892200 |
| H | 6.91598200  | -3.62920300 | -0.59138100 |
| H | 5.16497800  | -3.91201500 | -0.50614300 |
| H | 5.82889200  | -2.91808100 | -1.80595000 |
| C | 7.24936900  | -0.68625600 | -1.56963000 |
| H | 7.78030100  | 0.26087900  | -1.70375000 |
| H | 7.93232800  | -1.50493500 | -1.81804700 |
| H | 6.40747200  | -0.71036500 | -2.26869500 |
| C | 7.99377800  | -0.74414200 | 0.82965100  |
| H | 8.59966900  | -1.64647800 | 0.69086000  |
| H | 8.60895800  | 0.12655400  | 0.59096800  |
| H | 7.70544900  | -0.67298200 | 1.88060800  |
| C | 5.71816100  | -2.40548200 | 1.63441800  |
| H | 4.85563100  | -3.06569400 | 1.76423700  |
| H | 6.62248800  | -2.95823100 | 1.90844100  |
| H | 5.60758900  | -1.55749400 | 2.31774500  |

### Diradical 3

|   |             |             |             |
|---|-------------|-------------|-------------|
| C | 1.23458600  | 0.02212300  | -0.00296600 |
| C | -0.00000400 | -0.66089500 | -0.00006800 |
| C | -0.00000200 | -2.11482400 | -0.00007400 |
| C | 1.23712800  | -2.79551600 | 0.00064600  |
| C | 2.45035300  | -2.11139500 | -0.00102800 |
| C | -1.23459600 | 0.02211900  | 0.00283900  |
| C | -1.23713000 | -2.79552000 | -0.00079600 |
| C | -2.45035700 | -2.11140400 | 0.00089400  |
| C | -2.45211400 | -0.66231500 | 0.00553700  |
| C | -3.69704100 | 0.03756300  | 0.00950100  |
| H | -3.68417700 | 1.11950400  | -0.00554100 |
| C | -4.90707800 | -0.63867100 | 0.01575800  |
| C | -4.89701400 | -2.08607800 | 0.00629500  |
| C | -3.71954600 | -2.77743700 | -0.00330400 |
| H | -1.23627200 | 1.11029200  | 0.00311600  |
| H | 1.23625900  | 1.11029600  | -0.00323500 |
| H | 1.23880500  | -3.88400500 | 0.00300500  |
| H | -1.23880300 | -3.88400900 | -0.00316700 |
| H | -5.84039200 | -2.61407700 | 0.01836800  |
| H | -3.73485100 | -3.86507400 | -0.01121800 |
| C | 3.71954300  | -2.77742400 | 0.00317700  |

|   |              |             |             |
|---|--------------|-------------|-------------|
| C | 4.89701000   | -2.08606200 | -0.00638900 |
| H | 5.84038800   | -2.61405900 | -0.01844400 |
| C | 4.90707300   | -0.63865400 | -0.01582700 |
| C | 3.69703100   | 0.03757600  | -0.00960100 |
| H | 3.68416500   | 1.11951700  | 0.00543300  |
| H | 3.73485300   | -3.86506100 | 0.01107500  |
| C | 2.45210600   | -0.66230800 | -0.00565900 |
| C | -8.50757800  | 0.54801800  | -0.10209800 |
| C | -7.73299500  | 1.89263000  | 0.06649400  |
| C | 8.50756200   | 0.54801600  | 0.10236000  |
| C | 7.73302700   | 1.89262000  | -0.06652500 |
| C | -6.17128400  | 0.09276700  | 0.01367900  |
| C | 6.17127700   | 0.09278700  | -0.01370000 |
| N | 7.41380600   | -0.44212100 | -0.21025100 |
| N | 6.32059700   | 1.43311500  | 0.19291900  |
| N | -7.41378000  | -0.44210200 | 0.21047100  |
| N | -6.32061900  | 1.43307500  | -0.19310600 |
| O | -5.40056900  | 2.28912600  | -0.43509200 |
| O | -7.70493400  | -1.65466200 | 0.49495000  |
| O | 7.70498700   | -1.65471800 | -0.49454300 |
| O | 5.40052200   | 2.28922100  | 0.43462400  |
| C | -7.75191500  | 2.45019000  | 1.50283200  |
| H | -7.03311900  | 3.27211800  | 1.57144800  |
| H | -8.74504800  | 2.83565600  | 1.75464600  |
| H | -7.47607000  | 1.69049300  | 2.24111000  |
| C | -9.68264400  | 0.34540300  | 0.85478700  |
| H | -10.44409500 | 1.11131000  | 0.66932000  |
| H | -10.13038000 | -0.63658800 | 0.68486500  |
| H | -9.37969500  | 0.39804400  | 1.90278500  |
| C | -8.11129000  | 2.99422200  | -0.92381300 |
| H | -9.15933000  | 3.27798500  | -0.77605300 |
| H | -7.48650200  | 3.87374100  | -0.75157400 |
| H | -7.97461700  | 2.68440100  | -1.96214200 |
| C | -8.95397900  | 0.25754800  | -1.54831300 |
| H | -9.30118800  | -0.77827800 | -1.60795700 |
| H | -9.77824400  | 0.91682500  | -1.83881300 |
| H | -8.13528400  | 0.38782000  | -2.26307700 |
| C | 8.11116900   | 2.99433300  | 0.92370300  |
| H | 9.15921700   | 3.27811300  | 0.77603300  |
| H | 7.48637100   | 3.87380900  | 0.75128700  |
| H | 7.97438400   | 2.68462800  | 1.96205100  |
| C | 8.95373000   | 0.25772700  | 1.54868500  |
| H | 9.30089100   | -0.77810400 | 1.60852500  |
| H | 9.77797400   | 0.91701500  | 1.83921700  |
| H | 8.13492900   | 0.38812700  | 2.26330400  |
| C | 9.68278800   | 0.34524600  | -0.85430300 |

|   |             |             |             |
|---|-------------|-------------|-------------|
| H | 10.44423100 | 1.11115300  | -0.66880600 |
| H | 10.13046300 | -0.63673700 | -0.68417900 |
| H | 9.38001900  | 0.39775900  | -1.90236000 |
| C | 7.75216600  | 2.45000200  | -1.50292700 |
| H | 7.03341900  | 3.27195500  | -1.57174800 |
| H | 8.74535300  | 2.83538600  | -1.75465300 |
| H | 7.47638700  | 1.69022400  | -2.24114600 |

#### Diradical 4

|   |             |             |             |
|---|-------------|-------------|-------------|
| C | 4.84763400  | 2.18231500  | -0.05475100 |
| C | 3.77570400  | 3.03554900  | -0.08691200 |
| C | 2.43443400  | 2.55055400  | -0.07651500 |
| C | 2.22782000  | 1.12970000  | -0.04421600 |
| C | 3.35173100  | 0.25910500  | -0.02137700 |
| C | 4.64998400  | 0.75721700  | -0.01846900 |
| C | 1.31125200  | 3.39331900  | -0.09440300 |
| C | 0.91034100  | 0.62503000  | -0.03654600 |
| C | -0.20635500 | 1.45985200  | -0.05329900 |
| C | 0.00987000  | 2.88791300  | -0.08099700 |
| C | -1.12602400 | 3.77502200  | -0.09236200 |
| H | -0.94012900 | 4.84642600  | -0.11327700 |
| C | -2.39643300 | 3.29601200  | -0.07516700 |
| C | -1.57995600 | 0.95434500  | -0.04224500 |
| H | 1.45840900  | 4.47165600  | -0.11681300 |
| H | 5.85613600  | 2.57204000  | -0.04289600 |
| H | 3.94363900  | 4.10988800  | -0.11519900 |
| H | 3.18609000  | -0.81050300 | -0.01863300 |
| H | 0.78996200  | -0.45348700 | -0.01471400 |
| H | -3.24435500 | 3.97672900  | -0.08186700 |
| C | -1.90178400 | -0.42002700 | -0.02530600 |
| C | -3.20891900 | -0.87184900 | -0.01164000 |
| H | -3.41205700 | -1.93316200 | 0.00519000  |
| C | -4.29412400 | 0.04723300  | -0.01272000 |
| C | -3.99371000 | 1.41626000  | -0.03280900 |
| H | -4.79838200 | 2.13919600  | -0.04105600 |
| H | -1.11232500 | -1.16421700 | -0.02276900 |
| C | -2.66353500 | 1.87734500  | -0.04909600 |
| C | -7.57864000 | -1.85049000 | -0.17877200 |
| C | -8.04902600 | -0.43130800 | 0.26464200  |
| C | 8.04589500  | -0.93275600 | -0.02280600 |
| C | 7.08106200  | -2.15309500 | 0.10216500  |
| C | -5.67977400 | -0.42149300 | 0.00697500  |
| C | 5.79712400  | -0.14859200 | 0.00932100  |
| C | -7.78898900 | -2.13936600 | -1.67775900 |

|   |              |             |             |
|---|--------------|-------------|-------------|
| H | -7.25764400  | -3.05961200 | -1.93777000 |
| H | -8.85225300  | -2.27731500 | -1.89877700 |
| H | -7.40440800  | -1.33066700 | -2.30728000 |
| C | -9.20886700  | 0.15605100  | -0.54030900 |
| H | -10.10069400 | -0.46684100 | -0.40836300 |
| H | -9.43307800  | 1.16283200  | -0.18020800 |
| H | -8.98298500  | 0.22408900  | -1.60673100 |
| C | -8.12144100  | -3.01096000 | 0.65570200  |
| H | -9.21174700  | -3.05653000 | 0.55682200  |
| H | -7.70103000  | -3.95192100 | 0.29321000  |
| H | -7.86881000  | -2.91665900 | 1.71411900  |
| C | -8.34439300  | -0.30984100 | 1.77232300  |
| H | -8.46202300  | 0.74841800  | 2.02351500  |
| H | -9.27155600  | -0.83238500 | 2.02889000  |
| H | -7.53335400  | -0.71962600 | 2.38262600  |
| C | 8.58721600   | -0.70469200 | -1.44764300 |
| H | 9.07755000   | 0.27261400  | -1.48537800 |
| H | 9.32286300   | -1.47177400 | -1.71003600 |
| H | 7.78868400   | -0.71737100 | -2.19621900 |
| C | 7.33735500   | -3.29392300 | -0.88285700 |
| H | 8.32543100   | -3.72844200 | -0.69418400 |
| H | 6.58409800   | -4.07331600 | -0.74564800 |
| H | 7.29196000   | -2.96415800 | -1.92302900 |
| C | 9.19843100   | -0.90221200 | 0.98162700  |
| H | 9.84949100   | -1.76881100 | 0.82110500  |
| H | 9.78803400   | 0.00590500  | 0.83624200  |
| H | 8.84938700   | -0.91225700 | 2.01651200  |
| C | 6.95937500   | -2.71376100 | 1.53241000  |
| H | 6.12423000   | -3.41976300 | 1.56333100  |
| H | 7.87283800   | -3.24429200 | 1.81981000  |
| H | 6.76957300   | -1.92441300 | 2.26667300  |
| O | 7.54235600   | 1.36214300  | 0.55745600  |
| O | 4.73635900   | -2.20674200 | -0.49463300 |
| O | -5.35654000  | -2.77291800 | 0.04740800  |
| O | -6.84485100  | 1.64497400  | -0.01835500 |
| N | -6.08922200  | -1.72458000 | 0.02418500  |
| N | -6.79404800  | 0.36677700  | 0.01463100  |
| N | 5.75998000   | -1.49438400 | -0.20770800 |
| N | 7.09333600   | 0.20323300  | 0.25470000  |

### Diradical 5

|   |            |            |             |
|---|------------|------------|-------------|
| C | 2.21303700 | 0.21179000 | -0.01393000 |
|---|------------|------------|-------------|



|   |             |             |             |
|---|-------------|-------------|-------------|
| C | 3.54116200  | 0.65541700  | -0.00411700 |
| C | 3.77683100  | 2.05404400  | -0.00868000 |
| H | 4.79060300  | 2.42856300  | 0.00850000  |
| C | 2.71188400  | 2.93299800  | -0.02145400 |
| C | 1.36577700  | 2.50163400  | -0.02633700 |
| C | 1.12120500  | 1.10224100  | -0.02352300 |
| H | 2.94219800  | 3.99175800  | -0.02295100 |
| C | 0.24566500  | 3.44618500  | -0.03199500 |
| C | -1.09120500 | 2.96069900  | -0.02607500 |
| C | -1.34447300 | 1.51262700  | -0.02088100 |
| C | -0.25634700 | 0.60081600  | -0.02981100 |
| C | 0.45893300  | 4.84476400  | -0.04256100 |
| C | -0.59484000 | 5.74318800  | -0.04623000 |
| H | -0.39706100 | 6.81187100  | -0.05477500 |
| C | -1.91320800 | 5.26384500  | -0.03954900 |
| H | -2.75058800 | 5.95672800  | -0.04293200 |
| C | -2.14945200 | 3.89861300  | -0.02984900 |
| H | -3.17790700 | 3.55748600  | -0.02716400 |
| H | 1.46851300  | 5.23839500  | -0.04850600 |
| C | -2.66035900 | 1.01010800  | -0.01204600 |
| C | -2.93885400 | -0.36295300 | -0.01783600 |
| C | -1.84445200 | -1.26522500 | -0.03807500 |
| H | -2.02471800 | -2.33065500 | -0.04331200 |
| C | -0.55107500 | -0.78159100 | -0.04301900 |
| H | -3.49871800 | 1.68678400  | -0.00557600 |
| H | 0.25195100  | -1.50904400 | -0.05862800 |
| H | 2.04327900  | -0.85231000 | -0.02214300 |
| C | 6.85731300  | -1.18701600 | -0.11546900 |
| C | 5.85448000  | -2.34934400 | 0.16476100  |
| C | -6.20085700 | -2.29724700 | -0.20582500 |
| C | -6.68988800 | -0.88735300 | 0.24669500  |
| C | 4.64854100  | -0.30023200 | 0.00833600  |
| C | -4.32031500 | -0.84531600 | -0.00456200 |
| N | -4.71400000 | -2.15390500 | 0.00233500  |
| N | -5.44443300 | -0.07175900 | 0.00623000  |
| N | 4.54317300  | -1.65558400 | -0.10584700 |
| N | 5.97259000  | 0.00839600  | 0.13637900  |
| C | -6.40368500 | -2.57775000 | -1.70747300 |
| H | -5.85997600 | -3.48922800 | -1.97283100 |
| H | -7.46453500 | -2.72758100 | -1.93233200 |
| H | -6.02776200 | -1.75968400 | -2.33008400 |
| C | -7.85493700 | -0.30890100 | -0.55723400 |
| H | -8.73866000 | -0.94487100 | -0.43330600 |
| H | -8.09394200 | 0.69175700  | -0.18973400 |
| H | -7.62646700 | -0.22919400 | -1.62229400 |
| C | -6.73118800 | -3.47057900 | 0.61867400  |

|   |             |             |             |
|---|-------------|-------------|-------------|
| H | -7.82051900 | -3.52968600 | 0.51612000  |
| H | -6.29742200 | -4.40335100 | 0.25077700  |
| H | -6.48288300 | -3.38075800 | 1.67851400  |
| C | -6.99113100 | -0.78129100 | 1.75435800  |
| H | -7.12353000 | 0.27328500  | 2.01351400  |
| H | -7.91198700 | -1.31816900 | 2.00394100  |
| H | -6.17646900 | -1.18515800 | 2.36377100  |
| C | 7.30940500  | -1.08802000 | -1.58519400 |
| H | 7.84012400  | -0.14192000 | -1.72714700 |
| H | 7.98923700  | -1.90829700 | -1.83683400 |
| H | 6.46136600  | -1.11343100 | -2.27676000 |
| C | 5.99501400  | -3.56969300 | -0.74596700 |
| H | 6.97902500  | -4.02833000 | -0.59714000 |
| H | 5.22810400  | -4.30611600 | -0.49481800 |
| H | 5.88250600  | -3.31571700 | -1.80228400 |
| C | 8.07524600  | -1.13746700 | 0.80738400  |
| H | 8.67984700  | -2.04027200 | 0.66614200  |
| H | 8.68825400  | -0.26760200 | 0.56012900  |
| H | 7.79644700  | -1.06277400 | 1.86065700  |
| C | 5.80958000  | -2.79820900 | 1.63841900  |
| H | 4.94898300  | -3.45874900 | 1.77890600  |
| H | 6.71731000  | -3.34993200 | 1.90300100  |
| H | 5.70600400  | -1.94934600 | 2.32174600  |
| O | -3.96815400 | -3.19252000 | 0.02155900  |
| O | -5.51427500 | 1.20694900  | -0.01733900 |
| O | 6.49001000  | 1.16654900  | 0.30116100  |
| O | 3.47632200  | -2.34462500 | -0.26831300 |

### Diradical 6

|   |             |             |             |
|---|-------------|-------------|-------------|
| C | 4.81351300  | 2.34704300  | -0.00479600 |
| C | 3.75144900  | 3.22198600  | -0.01351200 |
| C | 2.40919500  | 2.76950700  | -0.01653300 |
| C | 2.15043300  | 1.36680400  | -0.01504700 |
| C | 3.25171400  | 0.48112900  | -0.00723500 |
| C | 4.57376400  | 0.93984100  | -0.00024100 |
| C | 1.31316400  | 3.68152100  | -0.02026100 |
| C | 0.77399600  | 0.89450600  | -0.02146800 |
| C | -0.29011700 | 1.83362600  | -0.02057500 |
| C | 0.02264300  | 3.23159000  | -0.02074700 |
| C | -1.66405100 | 1.36692900  | -0.01998100 |
| C | -1.92796600 | -0.03458300 | -0.02687500 |
| C | -0.82869500 | -0.94824700 | -0.03200700 |
| C | 0.46253200  | -0.50375000 | -0.02843600 |

|   |              |             |             |
|---|--------------|-------------|-------------|
| H | 1.52055500   | 4.74916800  | -0.02199900 |
| H | 5.82971900   | 2.71455200  | 0.00613800  |
| H | 3.94052200   | 4.29321700  | -0.01519800 |
| H | -0.78019100  | 3.95999900  | -0.02309400 |
| H | -1.03934300  | -2.01493900 | -0.03819200 |
| C | -3.25532000  | -0.51794400 | -0.02599000 |
| C | -4.34738000  | 0.35289600  | -0.01679600 |
| C | -4.08293600  | 1.75555200  | -0.00851500 |
| H | -4.91187800  | 2.44907100  | -0.00561500 |
| C | -2.78880400  | 2.23111400  | -0.01050000 |
| H | -2.65178100  | 3.30672800  | -0.00413600 |
| H | 1.26311600   | -1.23426100 | -0.03282600 |
| H | -3.42136600  | -1.58680100 | -0.02492900 |
| H | 3.09291400   | -0.58498400 | -0.01252600 |
| C | 7.89269500   | -0.89628700 | -0.17106400 |
| C | 6.91058300   | -2.04615300 | 0.21141400  |
| C | -8.08941800  | -0.23849700 | 0.22267000  |
| C | -7.56930200  | -1.64601300 | -0.20345900 |
| C | -5.71916100  | -0.15593300 | -0.01022700 |
| C | 5.68660400   | -0.01059200 | 0.00926700  |
| N | 5.58536300   | -1.37118000 | -0.03434400 |
| N | 7.01457400   | 0.30652300  | 0.06398200  |
| N | -6.08748000  | -1.46967600 | 0.01332900  |
| N | -6.85853800  | 0.59749800  | -0.02265200 |
| O | 4.51740900   | -2.07395000 | -0.11414400 |
| O | 7.53635900   | 1.47112100  | 0.15104700  |
| O | -6.95147100  | 1.87256400  | -0.07447900 |
| O | -5.32053700  | -2.49332400 | 0.05217000  |
| C | 6.93652300   | -2.42006800 | 1.70623200  |
| H | 6.09849700   | -3.09104300 | 1.91673200  |
| H | 7.86730100   | -2.93756300 | 1.95907100  |
| H | 6.84151000   | -1.54001300 | 2.35021500  |
| C | 9.15199900   | -0.79880900 | 0.69076400  |
| H | 9.74785000   | -1.71094100 | 0.57456200  |
| H | 9.75555700   | 0.05244800  | 0.36727000  |
| H | 8.92149300   | -0.66229900 | 1.74961900  |
| C | 7.01813000   | -3.30974900 | -0.64230200 |
| H | 8.01037300   | -3.75691000 | -0.51485100 |
| H | 6.26736400   | -4.03540900 | -0.32117100 |
| H | 6.85807800   | -3.10834700 | -1.70363600 |
| C | 8.27614400   | -0.86682800 | -1.66358200 |
| H | 8.78620800   | 0.07714400  | -1.87699800 |
| H | 8.95577300   | -1.69065500 | -1.90431900 |
| H | 7.39811700   | -0.93853600 | -2.31327300 |
| C | -9.25980200  | 0.30364100  | -0.59846900 |
| H | -10.13088700 | -0.34920200 | -0.47297300 |

|   |             |             |             |
|---|-------------|-------------|-------------|
| H | -9.52303400 | 1.30389600  | -0.24687400 |
| H | -9.02393800 | 0.37379800  | -1.66256000 |
| C | -7.75552500 | -1.95457500 | -1.70148100 |
| H | -7.19363200 | -2.86026400 | -1.94792600 |
| H | -8.81168400 | -2.12719900 | -1.93168100 |
| H | -7.38952800 | -1.14000300 | -2.33447500 |
| C | -8.40282100 | -0.11394400 | 1.72646000  |
| H | -8.56493100 | 0.94110000  | 1.96597200  |
| H | -9.31047100 | -0.67080100 | 1.98043300  |
| H | -7.58127400 | -0.48509400 | 2.34723400  |
| C | -8.08241000 | -2.81595500 | 0.63680100  |
| H | -9.17025800 | -2.89557000 | 0.53218100  |
| H | -7.63152300 | -3.74641500 | 0.28399400  |
| H | -7.83897400 | -2.70585000 | 1.69582800  |

### Diradical 7

|   |             |             |             |
|---|-------------|-------------|-------------|
| C | -3.88356300 | 0.20297000  | -0.08243300 |
| C | -3.74477100 | 1.56273300  | 0.20288500  |
| C | -2.48266200 | 2.19704900  | 0.18823400  |
| C | -1.28764700 | 1.44477300  | -0.05132100 |
| C | -1.47068900 | 0.08673600  | -0.42884000 |
| C | -2.70970000 | -0.51945100 | -0.44499800 |
| H | -3.32675400 | 4.17061100  | 0.52796500  |
| H | -4.62345100 | 2.15944000  | 0.40857800  |
| C | -2.40918400 | 3.61743800  | 0.34355500  |
| C | -0.00001000 | 2.11900700  | -0.00003900 |
| H | -0.62532300 | -0.49522300 | -0.77157500 |
| H | -2.79488800 | -1.55559300 | -0.74151300 |
| C | -0.00001100 | 3.53971600  | 0.00018100  |
| C | -1.21906100 | 4.26476500  | 0.19117500  |
| H | -1.17074900 | 5.35038700  | 0.23401400  |
| C | 1.21903900  | 4.26482700  | -0.19057100 |
| C | 2.40917400  | 3.61755000  | -0.34306500 |
| C | 2.48265400  | 2.19711900  | -0.18812900 |
| C | 1.28762300  | 1.44475700  | 0.05109100  |
| C | 1.47064600  | 0.08659400  | 0.42817100  |
| C | 2.70967000  | -0.51955800 | 0.44431700  |
| C | 3.88357400  | 0.20300900  | 0.08215300  |
| C | 3.74478600  | 1.56284400  | -0.20281900 |
| H | 2.79493400  | -1.55577900 | 0.74054300  |
| H | 0.62525400  | -0.49551700 | 0.77058100  |
| H | 4.62345500  | 2.15963900  | -0.40829200 |
| H | 1.17072100  | 5.35046000  | -0.23311100 |
| H | 3.32675000  | 4.17078200  | -0.52727000 |

|   |             |             |             |
|---|-------------|-------------|-------------|
| C | 6.90494700  | -2.07472800 | 0.36930400  |
| C | 7.51503900  | -0.81813100 | -0.32566100 |
| C | -7.51503400 | -0.81805300 | 0.32557200  |
| C | -6.90493400 | -2.07482400 | -0.36905900 |
| C | 5.19335300  | -0.44613100 | 0.05922100  |
| C | -5.19334500 | -0.44617300 | -0.05940000 |
| N | -6.39235700 | 0.17220800  | 0.14146500  |
| N | -5.43199100 | -1.78003100 | -0.23015100 |
| N | 5.43198500  | -1.77992500 | 0.23044600  |
| N | 6.39236400  | 0.17216200  | -0.14192500 |
| O | 4.57144500  | -2.70942700 | 0.40708400  |
| O | 6.60360000  | 1.42184800  | -0.31995800 |
| O | -6.60362100 | 1.42195900  | 0.31893600  |
| O | -4.57143400 | -2.70963500 | -0.40621100 |
| C | 7.18849100  | -2.15579100 | 1.88189900  |
| H | 6.55923300  | -2.93829600 | 2.31619400  |
| H | 8.23684700  | -2.41203000 | 2.06591000  |
| H | 6.96556800  | -1.21299600 | 2.39133600  |
| C | 8.79616600  | -0.27522600 | 0.30842000  |
| H | 9.59206400  | -1.02433800 | 0.23021700  |
| H | 9.11437200  | 0.62523900  | -0.22204900 |
| H | 8.66176100  | -0.01462200 | 1.36050400  |
| C | 7.23252300  | -3.41341000 | -0.29278700 |
| H | 8.31356300  | -3.58798400 | -0.25399100 |
| H | 6.73143500  | -4.22148100 | 0.24521400  |
| H | 6.90761900  | -3.45286800 | -1.33475500 |
| C | 7.70934100  | -0.97447200 | -1.84634100 |
| H | 7.94326800  | 0.00506800  | -2.27359400 |
| H | 8.53927100  | -1.65472300 | -2.06273100 |
| H | 6.80858600  | -1.35664900 | -2.33689800 |
| C | -8.79619800 | -0.27532200 | -0.30856700 |
| H | -9.59210200 | -1.02440200 | -0.23011500 |
| H | -9.11436600 | 0.62528500  | 0.22168900  |
| H | -8.66185800 | -0.01498800 | -1.36072600 |
| C | -7.18838100 | -2.15616400 | -1.88166500 |
| H | -6.55917500 | -2.93882400 | -2.31575800 |
| H | -8.23675400 | -2.41232900 | -2.06568400 |
| H | -6.96532300 | -1.21348700 | -2.39125800 |
| C | -7.70920800 | -0.97397400 | 1.84630500  |
| H | -7.94306800 | 0.00568100  | 2.27333500  |
| H | -8.53914200 | -1.65413800 | 2.06296200  |
| H | -6.80842700 | -1.35606100 | 2.33688700  |
| C | -7.23264800 | -3.41333400 | 0.29329100  |
| H | -8.31370800 | -3.58779400 | 0.25449900  |
| H | -6.73163500 | -4.22157500 | -0.24452300 |
| H | -6.90777800 | -3.45262300 | 1.33527700  |

# Optimized coordinate of the diradicals

## B3LYP/6-311++G(d,p)

Diradicals-1

|   |          |          |          |
|---|----------|----------|----------|
| C | -3.65818 | 2.21781  | 0.00252  |
| C | -1.22152 | 0.79958  | 0.00132  |
| C | -1.21958 | 2.24011  | -0.00120 |
| C | -2.48121 | 2.90723  | -0.00554 |
| C | -3.66906 | 0.77727  | 0.00948  |
| C | -2.46130 | 0.10116  | 0.00231  |
| H | -4.59901 | 2.74562  | 0.01741  |
| H | -2.49563 | 3.99212  | -0.01137 |
| C | -4.93289 | 0.04662  | 0.00697  |
| H | -2.44986 | -0.97836 | -0.01654 |
| N | -5.08259 | -1.28593 | -0.23193 |
| N | -6.16813 | 0.57781  | 0.23760  |
| C | -7.26982 | -0.40641 | -0.07669 |
| C | -6.49283 | -1.75364 | 0.03682  |
| O | -4.17042 | -2.13011 | -0.50877 |
| O | -6.45088 | 1.77832  | 0.55205  |
| C | -7.74590 | -0.07507 | -1.50192 |
| C | -8.41959 | -0.22685 | 0.91141  |
| C | -6.48238 | -2.35447 | 1.45327  |
| C | -6.88192 | -2.82382 | -0.98020 |
| H | -6.94420 | -0.18530 | -2.23472 |
| H | -8.57561 | -0.72214 | -1.79314 |
| H | -8.09085 | 0.96007  | -1.52306 |
| H | -8.84846 | 0.76786  | 0.79189  |
| H | -9.19738 | -0.96758 | 0.70934  |
| H | -8.09722 | -0.33017 | 1.94669  |
| H | -6.20025 | -1.61706 | 2.20736  |
| H | -7.46409 | -2.75716 | 1.70982  |
| H | -5.75633 | -3.16864 | 1.48160  |
| H | -6.23962 | -3.69496 | -0.85329 |
| H | -7.91843 | -3.12883 | -0.81585 |
| H | -6.77685 | -2.47698 | -2.00741 |

|   |         |          |          |
|---|---------|----------|----------|
| C | 0.00000 | 2.92362  | 0.00001  |
| C | 1.21958 | 2.24011  | 0.00120  |
| C | 1.22152 | 0.79958  | -0.00132 |
| C | 0.00000 | 0.11507  | -0.00000 |
| C | 2.46130 | 0.10116  | -0.00231 |
| C | 3.65818 | 2.21781  | -0.00252 |
| C | 2.48121 | 2.90723  | 0.00555  |
| H | 2.44986 | -0.97836 | 0.01653  |
| H | 2.49563 | 3.99212  | 0.01138  |
| H | 0.00000 | 4.00933  | 0.00001  |
| H | 0.00000 | -0.97016 | -0.00001 |
| C | 3.66906 | 0.77727  | -0.00948 |
| C | 4.93289 | 0.04662  | -0.00697 |
| N | 6.16813 | 0.57781  | -0.23761 |
| N | 5.08259 | -1.28593 | 0.23193  |
| C | 6.49283 | -1.75364 | -0.03682 |
| C | 7.26982 | -0.40641 | 0.07669  |
| O | 6.45088 | 1.77831  | -0.55207 |
| O | 4.17042 | -2.13011 | 0.50878  |
| C | 8.41959 | -0.22685 | -0.91141 |
| C | 7.74590 | -0.07506 | 1.50191  |
| C | 6.48238 | -2.35448 | -1.45326 |
| C | 6.88192 | -2.82382 | 0.98021  |
| H | 8.09722 | -0.33018 | -1.94670 |
| H | 8.84846 | 0.76786  | -0.79190 |
| H | 9.19738 | -0.96759 | -0.70934 |
| H | 8.57562 | -0.72213 | 1.79314  |
| H | 8.09085 | 0.96008  | 1.52305  |
| H | 6.94420 | -0.18529 | 2.23471  |
| H | 6.20025 | -1.61707 | -2.20735 |
| H | 7.46409 | -2.75717 | -1.70981 |
| H | 5.75633 | -3.16865 | -1.48159 |
| H | 6.23962 | -3.69496 | 0.85330  |
| H | 7.91844 | -3.12882 | 0.81586  |
| H | 6.77686 | -2.47697 | 2.00741  |
| H | 4.59901 | 2.74562  | -0.01740 |

#### Diradical-2

|   |          |         |          |
|---|----------|---------|----------|
| C | 3.70035  | 2.44730 | -0.05144 |
| C | 2.64477  | 3.32750 | -0.07156 |
| C | 1.30428  | 2.88448 | -0.06070 |
| C | 1.04455  | 1.48563 | -0.03741 |
| C | 2.13399  | 0.59504 | -0.02066 |
| C | 3.45647  | 1.04630 | -0.02310 |
| H | 0.43842  | 4.87432 | -0.08875 |
| H | 4.71621  | 2.80936 | -0.04383 |
| H | 2.84089  | 4.39445 | -0.09139 |
| C | 0.21375  | 3.81313 | -0.07108 |
| C | -0.33514 | 1.02235 | -0.03287 |

|   |          |          |          |
|---|----------|----------|----------|
| H | 1.96231  | -0.46785 | -0.01546 |
| C | -1.38718 | 1.97910  | -0.03695 |
| C | -1.07347 | 3.38033  | -0.05700 |
| H | -1.89407 | 4.08973  | -0.06292 |
| C | -2.73125 | 1.55951  | -0.02600 |
| C | -3.07049 | 0.20539  | -0.01410 |
| C | -2.01414 | -0.74729 | -0.01717 |
| H | -2.25281 | -1.79878 | -0.00760 |
| C | -0.69821 | -0.34170 | -0.02582 |
| H | 0.06731  | -1.10681 | -0.02934 |
| H | -3.51147 | 2.30519  | -0.03316 |
| C | -6.40781 | -1.59408 | -0.18873 |
| C | -6.83939 | -0.15779 | 0.23181  |
| C | 6.77581  | -0.79034 | -0.09331 |
| C | 5.77110  | -1.95477 | 0.15728  |
| C | -4.46830 | -0.22123 | -0.00106 |
| C | 4.56470  | 0.09386  | -0.00080 |
| N | 5.88446  | 0.40395  | 0.15198  |
| N | 4.46171  | -1.25907 | -0.12774 |
| N | -5.55581 | 0.60039  | -0.00900 |
| N | -4.91492 | -1.51055 | 0.02354  |
| O | -4.21880 | -2.57535 | 0.06196  |
| O | -5.56769 | 1.87312  | -0.05068 |
| O | 6.39631  | 1.55462  | 0.33665  |
| O | 3.40399  | -1.94460 | -0.31291 |
| C | -6.61185 | -1.89656 | -1.68354 |
| H | -6.10430 | -2.83228 | -1.92344 |
| H | -7.67326 | -2.00851 | -1.91324 |
| H | -6.19890 | -1.10955 | -2.31757 |
| C | -7.96496 | 0.45910  | -0.59518 |
| H | -8.88366 | -0.11555 | -0.45316 |
| H | -8.14042 | 1.48176  | -0.26212 |
| H | -7.73076 | 0.48842  | -1.65860 |
| C | -6.98530 | -2.72762 | 0.65548  |
| H | -8.07076 | -2.76141 | 0.53321  |
| H | -6.56865 | -3.67710 | 0.32016  |
| H | -6.75498 | -2.61562 | 1.71423  |
| C | -7.14827 | -0.00802 | 1.73181  |
| H | -7.23230 | 1.05451  | 1.96584  |
| H | -8.09318 | -0.49370 | 1.98331  |
| H | -6.36003 | -0.43530 | 2.35472  |
| C | 5.92294  | -3.16397 | -0.76286 |
| H | 6.89223  | -3.63852 | -0.59030 |
| H | 5.13863  | -3.88784 | -0.54280 |
| H | 5.84587  | -2.89693 | -1.81613 |
| C | 7.25259  | -0.67596 | -1.55160 |
| H | 7.78071  | 0.27125  | -1.67306 |
| H | 7.93820  | -1.48868 | -1.79901 |
| H | 6.41841  | -0.69672 | -2.25553 |
| C | 7.97381  | -0.74246 | 0.85183  |
| H | 8.59681  | -1.62746 | 0.70063  |
| H | 8.57070  | 0.14318  | 0.63535  |
| H | 7.67534  | -0.69803 | 1.89838  |



|   |         |          |         |
|---|---------|----------|---------|
| C | 5.69867 | -2.41688 | 1.62333 |
| H | 4.83471 | -3.07308 | 1.73993 |
| H | 6.59620 | -2.97415 | 1.89853 |
| H | 5.58607 | -1.57565 | 2.31007 |

Diradical-3

|   |          |          |          |
|---|----------|----------|----------|
| C | -1.23213 | -0.02272 | -0.00315 |
| C | -0.00000 | 0.65901  | 0.00000  |
| C | -0.00000 | 2.11013  | -0.00000 |
| C | -1.23478 | 2.78955  | 0.00137  |
| C | -2.44483 | 2.10671  | -0.00010 |
| C | 1.23212  | -0.02272 | 0.00315  |
| C | 1.23478  | 2.78955  | -0.00137 |
| C | 2.44483  | 2.10671  | 0.00009  |
| C | 2.44653  | 0.66031  | 0.00582  |
| C | 3.68990  | -0.03785 | 0.01030  |
| H | 3.67827  | -1.11736 | -0.00496 |
| C | 4.89611  | 0.63689  | 0.01602  |
| C | 4.88562  | 2.08233  | 0.00392  |
| C | 3.71221  | 2.77180  | -0.00591 |
| H | 1.23409  | -1.10810 | 0.00393  |
| H | -1.23410 | -1.10810 | -0.00392 |
| H | -1.23682 | 3.87521  | 0.00422  |
| H | 1.23683  | 3.87520  | -0.00422 |
| H | 5.82735  | 2.60837  | 0.01570  |
| H | 3.72768  | 3.85667  | -0.01538 |
| C | -3.71221 | 2.77180  | 0.00590  |
| C | -4.88562 | 2.08234  | -0.00392 |
| H | -5.82735 | 2.60838  | -0.01569 |
| C | -4.89612 | 0.63691  | -0.01602 |
| C | -3.68991 | -0.03784 | -0.01030 |
| H | -3.67828 | -1.11735 | 0.00496  |
| H | -3.72767 | 3.85668  | 0.01538  |
| C | -2.44654 | 0.66031  | -0.00582 |
| C | 8.49591  | -0.54595 | -0.09154 |
| C | 7.72187  | -1.89174 | 0.05316  |
| C | -8.49591 | -0.54596 | 0.09154  |
| C | -7.72186 | -1.89174 | -0.05316 |
| C | 6.15918  | -0.09298 | 0.01389  |
| C | -6.15919 | -0.09297 | -0.01389 |
| N | -7.39781 | 0.44188  | -0.22269 |
| N | -6.30800 | -1.42952 | 0.20496  |
| N | 7.39781  | 0.44188  | 0.22269  |
| N | 6.30801  | -1.42953 | -0.20496 |
| O | 5.39350  | -2.27952 | -0.45591 |
| O | 7.68449  | 1.64614  | 0.51828  |
| O | -7.68451 | 1.64613  | -0.51828 |
| O | -5.39348 | -2.27951 | 0.45590  |
| C | 7.73145  | -2.46985 | 1.47896  |
| H | 7.01027  | -3.28732 | 1.52934  |

|   |           |          |          |
|---|-----------|----------|----------|
| H | 8.71849   | -2.86298 | 1.72983  |
| H | 7.45456   | -1.72191 | 2.22457  |
| C | 9.65881   | -0.35037 | 0.87809  |
| H | 10.43407  | -1.09418 | 0.67759  |
| H | 10.08578  | 0.64232  | 0.73702  |
| H | 9.35027   | -0.43708 | 1.91911  |
| C | 8.09924   | -2.97731 | -0.95178 |
| H | 9.13743   | -3.28037 | -0.79446 |
| H | 7.45809   | -3.84610 | -0.80460 |
| H | 7.98290   | -2.64589 | -1.98282 |
| C | 8.95266   | -0.23591 | -1.52794 |
| H | 9.29612   | 0.79914  | -1.56929 |
| H | 9.77929   | -0.88650 | -1.82005 |
| H | 8.14152   | -0.35813 | -2.24834 |
| C | -8.09922  | -2.97732 | 0.95178  |
| H | -9.13740  | -3.28039 | 0.79445  |
| H | -7.45806  | -3.84611 | 0.80459  |
| H | -7.98288  | -2.64590 | 1.98282  |
| C | -8.95267  | -0.23592 | 1.52795  |
| H | -9.29613  | 0.79912  | 1.56929  |
| H | -9.77928  | -0.88653 | 1.82006  |
| H | -8.14152  | -0.35813 | 2.24835  |
| C | -9.65881  | -0.35039 | -0.87809 |
| H | -10.43406 | -1.09421 | -0.67759 |
| H | -10.08579 | 0.64230  | -0.73701 |
| H | -9.35027  | -0.43709 | -1.91911 |
| C | -7.73144  | -2.46986 | -1.47896 |
| H | -7.01026  | -3.28732 | -1.52934 |
| H | -8.71847  | -2.86298 | -1.72983 |
| H | -7.45455  | -1.72190 | -2.22457 |

#### Diradical-4

|   |          |          |          |
|---|----------|----------|----------|
| C | 4.83643  | 2.17657  | -0.06348 |
| C | 3.76820  | 3.02741  | -0.09980 |
| C | 2.42915  | 2.54327  | -0.08489 |
| C | 2.22252  | 1.12557  | -0.04389 |
| C | 3.34479  | 0.25686  | -0.01727 |
| C | 4.63914  | 0.75417  | -0.01798 |
| C | 1.30904  | 3.38518  | -0.10685 |
| C | 0.90745  | 0.62273  | -0.03286 |
| C | -0.20586 | 1.45651  | -0.05390 |
| C | 0.01048  | 2.88142  | -0.08992 |
| C | -1.12388 | 3.76720  | -0.10635 |
| H | -0.93835 | 4.83575  | -0.13313 |
| C | -2.39034 | 3.29023  | -0.08711 |
| C | -1.57782 | 0.95248  | -0.04021 |
| H | 1.45635  | 4.46048  | -0.13574 |
| H | 5.84305  | 2.56456  | -0.05363 |
| H | 3.93596  | 4.09877  | -0.13492 |
| H | 3.18054  | -0.81053 | -0.01039 |
| H | 0.78562  | -0.45292 | -0.00519 |

|   |           |          |          |
|---|-----------|----------|----------|
| H | -3.23590  | 3.96953  | -0.09790 |
| C | -1.89854  | -0.41905 | -0.01538 |
| C | -3.20212  | -0.86934 | -0.00149 |
| H | -3.40647  | -1.92786 | 0.01962  |
| C | -4.28534  | 0.04802  | -0.00936 |
| C | -3.98579  | 1.41386  | -0.03611 |
| H | -4.78915  | 2.13447  | -0.04804 |
| H | -1.11015  | -1.16063 | -0.00725 |
| C | -2.65827  | 1.87383  | -0.05342 |
| C | -7.56891  | -1.84780 | -0.17880 |
| C | -8.03846  | -0.43159 | 0.26853  |
| C | 8.03547   | -0.92893 | -0.00605 |
| C | 7.07299   | -2.15192 | 0.08818  |
| C | -5.66931  | -0.42027 | 0.01008  |
| C | 5.78561   | -0.14952 | 0.01183  |
| C | -7.78113  | -2.13377 | -1.67570 |
| H | -7.24867  | -3.05000 | -1.93593 |
| H | -8.84133  | -2.27402 | -1.89517 |
| H | -7.39944  | -1.32505 | -2.30199 |
| C | -9.19113  | 0.16385  | -0.53676 |
| H | -10.09076 | -0.43998 | -0.39367 |
| H | -9.39302  | 1.17566  | -0.18599 |
| H | -8.96984  | 0.21621  | -1.60204 |
| C | -8.10224  | -3.01068 | 0.65460  |
| H | -9.18739  | -3.07639 | 0.54307  |
| H | -7.66018  | -3.94187 | 0.30100  |
| H | -7.86419  | -2.90695 | 1.71251  |
| C | -8.33553  | -0.31414 | 1.77380  |
| H | -8.44983  | 0.74153  | 2.02534  |
| H | -9.26222  | -0.83275 | 2.02720  |
| H | -7.52792  | -0.72627 | 2.38193  |
| C | 8.59476   | -0.67759 | -1.41760 |
| H | 9.07878   | 0.30039  | -1.43194 |
| H | 9.33654   | -1.43425 | -1.68053 |
| H | 7.80848   | -0.68241 | -2.17501 |
| C | 7.33432   | -3.27209 | -0.91558 |
| H | 8.30628   | -3.72914 | -0.71370 |
| H | 6.56374   | -4.03594 | -0.81344 |
| H | 7.32048   | -2.91795 | -1.94549 |
| C | 9.17080   | -0.90481 | 1.01492  |
| H | 9.84012   | -1.75125 | 0.84206  |
| H | 9.74067   | 0.01698  | 0.90085  |
| H | 8.80781   | -0.94839 | 2.04105  |
| C | 6.93863   | -2.73763 | 1.50463  |
| H | 6.10777   | -3.44507 | 1.51205  |
| H | 7.84815   | -3.26881 | 1.79185  |
| H | 6.73737   | -1.96404 | 2.24829  |
| O | 7.51700   | 1.35461  | 0.59105  |
| O | 4.73423   | -2.19780 | -0.51865 |
| O | -5.34744  | -2.76571 | 0.02661  |
| O | -6.83085  | 1.64085  | 0.00813  |
| N | -6.07664  | -1.72243 | 0.01781  |
| N | -6.78099  | 0.36862  | 0.02647  |

|   |         |          |          |
|---|---------|----------|----------|
| N | 5.75032 | -1.49090 | -0.21980 |
| N | 7.07632 | 0.20362  | 0.27301  |

Diradical-5

|   |          |          |          |
|---|----------|----------|----------|
| C | 2.20845  | 0.21117  | -0.01188 |
| C | 3.53343  | 0.65395  | -0.00485 |
| C | 3.76866  | 2.05024  | -0.01440 |
| H | 4.78076  | 2.42229  | 0.00080  |
| C | 2.70714  | 2.92723  | -0.02843 |
| C | 1.36386  | 2.49619  | -0.02994 |
| C | 1.11910  | 1.10022  | -0.02276 |
| H | 2.93522  | 3.98391  | -0.03367 |
| C | 0.24584  | 3.43978  | -0.03562 |
| C | -1.08804 | 2.95608  | -0.02606 |
| C | -1.34189 | 1.51027  | -0.01945 |
| C | -0.25670 | 0.60017  | -0.02692 |
| C | 0.45931  | 4.83556  | -0.04867 |
| C | -0.59161 | 5.73125  | -0.05098 |
| H | -0.39513 | 6.79730  | -0.06134 |
| C | -1.90724 | 5.25353  | -0.04015 |
| H | -2.74143 | 5.94590  | -0.04193 |
| C | -2.14401 | 3.89241  | -0.02796 |
| H | -3.16988 | 3.55118  | -0.02148 |
| H | 1.46697  | 5.22707  | -0.05721 |
| C | -2.65543 | 1.00947  | -0.01112 |
| C | -2.93324 | -0.36048 | -0.01534 |
| C | -1.84051 | -1.26122 | -0.03290 |
| H | -2.02221 | -2.32389 | -0.03749 |
| C | -0.55051 | -0.77958 | -0.03753 |
| H | -3.49150 | 1.68564  | -0.00613 |
| H | 0.25189  | -1.50422 | -0.05186 |
| H | 2.03810  | -0.85074 | -0.01710 |
| C | 6.84897  | -1.18605 | -0.10927 |
| C | 5.84659  | -2.34877 | 0.16031  |
| C | -6.19363 | -2.29433 | -0.20640 |
| C | -6.68255 | -0.88651 | 0.24658  |
| C | 4.63992  | -0.29998 | 0.00862  |
| C | -4.31286 | -0.84294 | -0.00324 |
| N | -4.70406 | -2.15065 | -0.00377 |
| N | -5.43461 | -0.06908 | 0.01376  |
| N | 4.53345  | -1.65332 | -0.10779 |
| N | 5.96156  | 0.01040  | 0.13988  |
| C | -6.39730 | -2.57544 | -1.70542 |
| H | -5.85247 | -3.48359 | -1.96841 |
| H | -7.45491 | -2.72798 | -1.92912 |
| H | -6.02374 | -1.75896 | -2.32651 |
| C | -7.83972 | -0.30172 | -0.56013 |
| H | -8.73163 | -0.91860 | -0.42460 |
| H | -8.05689 | 0.70509  | -0.20424 |
| H | -7.61444 | -0.24001 | -1.62406 |

|   |          |          |          |
|---|----------|----------|----------|
| C | -6.71469 | -3.46823 | 0.61934  |
| H | -7.79847 | -3.54784 | 0.50352  |
| H | -6.25898 | -4.39169 | 0.26281  |
| H | -6.48172 | -3.36673 | 1.67860  |
| C | -6.98717 | -0.78135 | 1.75124  |
| H | -7.11705 | 0.27117  | 2.00827  |
| H | -7.90758 | -1.31422 | 1.99781  |
| H | -6.17640 | -1.18584 | 2.36026  |
| C | 7.30842  | -1.07964 | -1.57373 |
| H | 7.83593  | -0.13357 | -1.70614 |
| H | 7.99027  | -1.89428 | -1.82513 |
| H | 6.46597  | -1.10300 | -2.26765 |
| C | 5.98381  | -3.56130 | -0.75777 |
| H | 6.95426  | -4.03741 | -0.59646 |
| H | 5.20088  | -4.28262 | -0.52484 |
| H | 5.89351  | -3.29735 | -1.81076 |
| C | 8.05827  | -1.13379 | 0.82114  |
| H | 8.67927  | -2.01964 | 0.66677  |
| H | 8.65271  | -0.24936 | 0.59313  |
| H | 7.77235  | -1.08426 | 1.87095  |
| C | 5.79537  | -2.80600 | 1.62877  |
| H | 4.93382  | -3.46265 | 1.75969  |
| H | 6.69730  | -3.36146 | 1.89292  |
| H | 5.69146  | -1.96281 | 2.31446  |
| O | -3.96154 | -3.18402 | 0.00411  |
| O | -5.50364 | 1.20355  | 0.00152  |
| O | 6.47571  | 1.16301  | 0.30492  |
| O | 3.47186  | -2.33873 | -0.27041 |

#### Diradical-6

|   |          |          |          |
|---|----------|----------|----------|
| C | 4.80282  | 2.34039  | -0.04649 |
| C | 3.74426  | 3.21322  | -0.07014 |
| C | 2.40468  | 2.76080  | -0.06321 |
| C | 2.14651  | 1.36128  | -0.04075 |
| C | 3.24577  | 0.47755  | -0.02032 |
| C | 4.56359  | 0.93646  | -0.01840 |
| C | 1.31027  | 3.67121  | -0.07666 |
| C | 0.77220  | 0.89007  | -0.04067 |
| C | -0.28872 | 1.82719  | -0.04611 |
| C | 0.02368  | 3.22266  | -0.06556 |
| C | -1.66040 | 1.36151  | -0.03604 |
| C | -1.92372 | -0.03674 | -0.03094 |
| C | -0.82621 | -0.94921 | -0.03345 |
| C | 0.46108  | -0.50588 | -0.03649 |
| H | 1.51733  | 4.73598  | -0.09456 |
| H | 5.81718  | 2.70640  | -0.03583 |
| H | 3.93234  | 4.28162  | -0.08971 |
| H | -0.77822 | 3.94834  | -0.07508 |
| H | -1.03674 | -2.01321 | -0.03287 |

|   |           |          |          |
|---|-----------|----------|----------|
| C | -3.24908  | -0.51789 | -0.02225 |
| C | -4.33758  | 0.35215  | -0.01554 |
| C | -4.07258  | 1.75220  | -0.01819 |
| H | -4.90002  | 2.44369  | -0.01594 |
| C | -2.78181  | 2.22546  | -0.02889 |
| H | -2.64248  | 3.29820  | -0.03092 |
| H | 1.26099   | -1.23359 | -0.04088 |
| H | -3.41659  | -1.58399 | -0.01424 |
| H | 3.08641   | -0.58652 | -0.01604 |
| C | 7.89252   | -0.88322 | -0.08098 |
| C | 6.89308   | -2.05410 | 0.16001  |
| C | -8.07691  | -0.23821 | 0.24848  |
| C | -7.56192  | -1.64131 | -0.19075 |
| C | -5.70820  | -0.15478 | -0.00117 |
| C | 5.67626   | -0.01117 | 0.00668  |
| N | 5.58104   | -1.36392 | -0.12635 |
| N | 6.99396   | 0.30495  | 0.16725  |
| N | -6.07528  | -1.46751 | 0.00961  |
| N | -6.84450  | 0.60056  | 0.00651  |
| O | 4.52758   | -2.05483 | -0.31761 |
| O | 7.49895   | 1.45689  | 0.36154  |
| O | -6.93612  | 1.86989  | -0.02349 |
| O | -5.31227  | -2.48682 | 0.02354  |
| C | 6.81787   | -2.52393 | 1.62345  |
| H | 5.95673   | -3.18487 | 1.73386  |
| H | 7.71716   | -3.07823 | 1.89892  |
| H | 6.69897   | -1.68664 | 2.31394  |
| C | 9.08699   | -0.83403 | 0.86857  |
| H | 9.71481   | -1.71528 | 0.71537  |
| H | 9.68040   | 0.05546  | 0.65841  |
| H | 8.78472   | -0.79599 | 1.91429  |
| C | 7.05495   | -3.25779 | -0.76571 |
| H | 8.02645   | -3.72747 | -0.59230 |
| H | 6.27425   | -3.98743 | -0.55189 |
| H | 6.97980   | -2.98604 | -1.81792 |
| C | 8.37364   | -0.75884 | -1.53702 |
| H | 8.89701   | 0.19183  | -1.65190 |
| H | 9.06456   | -1.56650 | -1.78624 |
| H | 7.54200   | -0.78053 | -2.24392 |
| C | -9.24529  | 0.31695  | -0.56287 |
| H | -10.12613 | -0.31380 | -0.41888 |
| H | -9.47949  | 1.32383  | -0.21809 |
| H | -9.02260  | 0.37069  | -1.62777 |
| C | -7.76107  | -1.94091 | -1.68668 |
| H | -7.19881  | -2.84074 | -1.94151 |
| H | -8.81565  | -2.11628 | -1.90781 |
| H | -7.40407  | -1.12323 | -2.31590 |
| C | -8.38223  | -0.12371 | 1.75230  |
| H | -8.53295  | 0.92862  | 1.99860  |
| H | -9.29161  | -0.67231 | 2.00528  |
| H | -7.56299  | -0.50570 | 2.36451  |
| C | -8.06040  | -2.81637 | 0.64718  |
| H | -9.14247  | -2.91797 | 0.53246  |

|   |          |          |         |
|---|----------|----------|---------|
| H | -7.58696 | -3.73449 | 0.30006 |
| H | -7.82941 | -2.69934 | 1.70530 |

Diradical-7

|   |          |          |          |
|---|----------|----------|----------|
| C | -3.87516 | 0.20320  | -0.08046 |
| C | -3.73686 | 1.55943  | 0.20586  |
| C | -2.47738 | 2.19271  | 0.19137  |
| C | -1.28568 | 1.44199  | -0.04970 |
| C | -1.46786 | 0.08673  | -0.42705 |
| C | -2.70347 | -0.51740 | -0.44411 |
| H | -3.31808 | 4.16252  | 0.53221  |
| H | -4.61390 | 2.15379  | 0.41235  |
| C | -2.40315 | 3.61084  | 0.34619  |
| C | -0.00001 | 2.11511  | -0.00002 |
| H | -0.62288 | -0.49369 | -0.76499 |
| H | -2.79001 | -1.55082 | -0.74079 |
| C | 0.00000  | 3.53228  | 0.00005  |
| C | -1.21679 | 4.25606  | 0.19310  |
| H | -1.16829 | 5.33891  | 0.23601  |
| C | 1.21680  | 4.25606  | -0.19293 |
| C | 2.40316  | 3.61084  | -0.34604 |
| C | 2.47737  | 2.19270  | -0.19135 |
| C | 1.28565  | 1.44197  | 0.04961  |
| C | 1.46782  | 0.08667  | 0.42682  |
| C | 2.70341  | -0.51748 | 0.44389  |
| C | 3.87513  | 0.20315  | 0.08037  |
| C | 3.73684  | 1.55941  | -0.20584 |
| H | 2.78994  | -1.55092 | 0.74048  |
| H | 0.62282  | -0.49379 | 0.76465  |
| H | 4.61389  | 2.15378  | -0.41226 |
| H | 1.16832  | 5.33891  | -0.23575 |
| H | 3.31810  | 4.16252  | -0.53200 |
| C | 6.89536  | -2.07325 | 0.36735  |
| C | 7.50529  | -0.81708 | -0.32426 |
| C | -7.50530 | -0.81707 | 0.32420  |
| C | -6.89531 | -2.07332 | -0.36722 |
| C | 5.18340  | -0.44516 | 0.05815  |
| C | -5.18342 | -0.44513 | -0.05820 |
| N | -6.37993 | 0.17387  | 0.14457  |
| N | -5.42030 | -1.77741 | -0.23149 |
| N | 5.42033  | -1.77741 | 0.23164  |
| N | 6.37989  | 0.17385  | -0.14475 |
| O | 4.56447  | -2.70191 | 0.41105  |
| O | 6.58943  | 1.41678  | -0.32637 |
| O | -6.58952 | 1.41683  | 0.32596  |
| O | -4.56439 | -2.70191 | -0.41072 |
| C | 7.17699  | -2.15750 | 1.87780  |
| H | 6.54613  | -2.93754 | 2.30729  |
| H | 8.22141  | -2.41653 | 2.06262  |

|   |          |          |          |
|---|----------|----------|----------|
| H | 6.95545  | -1.21738 | 2.38669  |
| C | 8.78002  | -0.26886 | 0.31290  |
| H | 9.58512  | -1.00172 | 0.21688  |
| H | 9.07804  | 0.64350  | -0.20319 |
| H | 8.64749  | -0.02951 | 1.36727  |
| C | 7.21623  | -3.40989 | -0.29716 |
| H | 8.29085  | -3.60038 | -0.24030 |
| H | 6.69382  | -4.20975 | 0.22715  |
| H | 6.90960  | -3.43817 | -1.34199 |
| C | 7.70207  | -0.97014 | -1.84262 |
| H | 7.93265  | 0.00931  | -2.26489 |
| H | 8.53252  | -1.64490 | -2.05918 |
| H | 6.80489  | -1.35255 | -2.33321 |
| C | -8.78004 | -0.26899 | -0.31305 |
| H | -9.58512 | -1.00187 | -0.21695 |
| H | -9.07811 | 0.64342  | 0.20292  |
| H | -8.64751 | -0.02977 | -1.36745 |
| C | -7.17689 | -2.15777 | -1.87766 |
| H | -6.54601 | -2.93786 | -2.30704 |
| H | -8.22131 | -2.41685 | -2.06247 |
| H | -6.95536 | -1.21772 | -2.38667 |
| C | -7.70209 | -0.96992 | 1.84259  |
| H | -7.93271 | 0.00957  | 2.26471  |
| H | -8.53252 | -1.64468 | 2.05923  |
| H | -6.80490 | -1.35224 | 2.33323  |
| C | -7.21616 | -3.40988 | 0.29746  |
| H | -8.29078 | -3.60041 | 0.24059  |
| H | -6.69371 | -4.20980 | -0.22672 |
| H | -6.90957 | -3.43801 | 1.34231  |

## BP86/6-311++G(d,p)

Diradical-1

|   |          |         |          |
|---|----------|---------|----------|
| C | -3.67728 | 2.22381 | -0.00415 |
| C | -1.22900 | 0.79621 | 0.00187  |
| C | -1.22637 | 2.24671 | -0.00220 |
| C | -2.49049 | 2.91662 | -0.00934 |
| C | -3.68933 | 0.77851 | 0.00857  |
| C | -2.47188 | 0.09552 | 0.00658  |



|   |          |          |          |
|---|----------|----------|----------|
| H | -4.62903 | 2.75265  | 0.00256  |
| H | -2.50389 | 4.01077  | -0.01686 |
| C | -4.95623 | 0.04920  | 0.01036  |
| H | -2.46729 | -0.99447 | -0.00280 |
| N | -5.10116 | -1.31143 | -0.11365 |
| N | -6.20962 | 0.60207  | 0.13106  |
| C | -7.30065 | -0.42255 | -0.15521 |
| C | -6.53789 | -1.74913 | 0.14494  |
| O | -4.17860 | -2.18625 | -0.26530 |
| O | -6.51430 | 1.83239  | 0.31061  |
| C | -7.67552 | -0.23705 | -1.63950 |
| C | -8.51157 | -0.13792 | 0.73497  |
| C | -6.58948 | -2.17891 | 1.62488  |
| C | -6.88039 | -2.93101 | -0.76320 |
| H | -6.81979 | -0.42814 | -2.30476 |
| H | -8.49821 | -0.91179 | -1.92060 |
| H | -8.00802 | 0.80075  | -1.79135 |
| H | -8.90633 | 0.86056  | 0.50106  |
| H | -9.29989 | -0.88199 | 0.54026  |
| H | -8.26000 | -0.15949 | 1.80379  |
| H | -6.33709 | -1.34685 | 2.29970  |
| H | -7.59054 | -2.55354 | 1.88714  |
| H | -5.86116 | -2.98827 | 1.78295  |
| H | -6.20795 | -3.76955 | -0.53408 |
| H | -7.91774 | -3.25273 | -0.58070 |
| H | -6.76658 | -2.68829 | -1.82824 |
| C | 0.00000  | 2.93351  | 0.00001  |
| C | 1.22637  | 2.24670  | 0.00221  |
| C | 1.22899  | 0.79620  | -0.00188 |
| C | -0.00001 | 0.10836  | -0.00001 |
| C | 2.47187  | 0.09551  | -0.00660 |
| C | 3.67727  | 2.22378  | 0.00417  |
| C | 2.49049  | 2.91661  | 0.00936  |
| H | 2.46726  | -0.99449 | 0.00276  |
| H | 2.50390  | 4.01075  | 0.01690  |
| H | 0.00001  | 4.02860  | 0.00002  |
| H | -0.00001 | -0.98616 | -0.00002 |
| C | 3.68932  | 0.77849  | -0.00857 |
| C | 4.95622  | 0.04918  | -0.01037 |
| N | 6.20960  | 0.60207  | -0.13107 |
| N | 5.10117  | -1.31145 | 0.11365  |
| C | 6.53791  | -1.74912 | -0.14493 |
| C | 7.30065  | -0.42253 | 0.15521  |
| O | 6.51425  | 1.83239  | -0.31064 |
| O | 4.17863  | -2.18628 | 0.26532  |
| C | 8.51156  | -0.13789 | -0.73498 |
| C | 7.67551  | -0.23701 | 1.63949  |
| C | 6.58950  | -2.17892 | -1.62487 |
| C | 6.88043  | -2.93099 | 0.76323  |
| H | 8.25999  | -0.15948 | -1.80381 |
| H | 8.90630  | 0.86060  | -0.50108 |
| H | 9.29989  | -0.88194 | -0.54027 |
| H | 8.49822  | -0.91173 | 1.92060  |

|   |         |          |          |
|---|---------|----------|----------|
| H | 8.00800 | 0.80081  | 1.79132  |
| H | 6.81979 | -0.42811 | 2.30475  |
| H | 6.33709 | -1.34688 | -2.29970 |
| H | 7.59058 | -2.55354 | -1.88712 |
| H | 5.86121 | -2.98830 | -1.78293 |
| H | 6.20800 | -3.76954 | 0.53412  |
| H | 7.91779 | -3.25269 | 0.58073  |
| H | 6.76662 | -2.68826 | 1.82826  |
| H | 4.62903 | 2.75262  | -0.00253 |

#### Diradical-2

|   |          |          |          |
|---|----------|----------|----------|
| C | 3.72037  | 2.45668  | -0.04647 |
| C | 2.65928  | 3.34347  | -0.06593 |
| C | 1.31153  | 2.90025  | -0.05888 |
| C | 1.04820  | 1.49090  | -0.03974 |
| C | 2.14097  | 0.59513  | -0.02433 |
| C | 3.47198  | 1.04948  | -0.02304 |
| H | 0.44723  | 4.90191  | -0.08315 |
| H | 4.74846  | 2.81483  | -0.03447 |
| H | 2.85714  | 4.41959  | -0.08224 |
| C | 0.21939  | 3.83190  | -0.06802 |
| C | -0.33545 | 1.02828  | -0.03673 |
| H | 1.97202  | -0.47952 | -0.02359 |
| C | -1.39484 | 1.99305  | -0.03879 |
| C | -1.07896 | 3.39734  | -0.05617 |
| H | -1.90588 | 4.11349  | -0.06123 |
| C | -2.74515 | 1.57150  | -0.02808 |
| C | -3.08443 | 0.20804  | -0.01783 |
| C | -2.02409 | -0.75024 | -0.02337 |
| H | -2.27126 | -1.81039 | -0.01447 |
| C | -0.70025 | -0.34177 | -0.03214 |
| H | 0.07353  | -1.11212 | -0.03735 |
| H | -3.53702 | 2.32036  | -0.03440 |
| C | -6.43582 | -1.59952 | -0.19348 |
| C | -6.86815 | -0.16501 | 0.23950  |
| C | 6.80165  | -0.80249 | -0.10101 |
| C | 5.79552  | -1.96459 | 0.16688  |
| C | -4.48275 | -0.22071 | -0.00362 |
| C | 4.58028  | 0.09540  | -0.00125 |
| N | 5.90995  | 0.40759  | 0.15182  |
| N | 4.47356  | -1.26816 | -0.12866 |
| N | -5.57901 | 0.60717  | -0.01254 |
| N | -4.92970 | -1.52055 | 0.02426  |
| O | -4.23111 | -2.59247 | 0.06173  |
| O | -5.59480 | 1.88696  | -0.05389 |
| O | 6.42982  | 1.56347  | 0.33147  |
| O | 3.40999  | -1.95902 | -0.31027 |
| C | -6.63182 | -1.88596 | -1.69599 |
| H | -6.11535 | -2.82485 | -1.94566 |
| H | -7.70024 | -2.00008 | -1.93409 |

|   |          |          |          |
|---|----------|----------|----------|
| H | -6.21488 | -1.08289 | -2.32262 |
| C | -8.00186 | 0.45885  | -0.57588 |
| H | -8.93488 | -0.10093 | -0.40540 |
| H | -8.15202 | 1.49794  | -0.25117 |
| H | -7.78641 | 0.46854  | -1.65272 |
| C | -7.01039 | -2.74432 | 0.64238  |
| H | -8.10040 | -2.80143 | 0.49588  |
| H | -6.56217 | -3.69237 | 0.31379  |
| H | -6.80257 | -2.62512 | 1.71417  |
| C | -7.15618 | -0.02269 | 1.74780  |
| H | -7.23428 | 1.04778  | 1.99010  |
| H | -8.10673 | -0.51048 | 2.01216  |
| H | -6.35347 | -0.45955 | 2.36119  |
| C | 5.93975  | -3.18767 | -0.74050 |
| H | 6.90137  | -3.68697 | -0.54289 |
| H | 5.12725  | -3.89588 | -0.52627 |
| H | 5.88850  | -2.92678 | -1.80610 |
| C | 7.25651  | -0.69121 | -1.56998 |
| H | 7.78458  | 0.26498  | -1.70262 |
| H | 7.94619  | -1.50915 | -1.82780 |
| H | 6.40369  | -0.71640 | -2.26523 |
| C | 8.01097  | -0.74756 | 0.83332  |
| H | 8.65785  | -1.62081 | 0.65542  |
| H | 8.58795  | 0.16431  | 0.62525  |
| H | 7.72095  | -0.73059 | 1.89229  |
| C | 5.71922  | -2.40267 | 1.64366  |
| H | 4.84449  | -3.05795 | 1.77000  |
| H | 6.62035  | -2.96465 | 1.93226  |
| H | 5.60830  | -1.54180 | 2.32047  |

### Diradical-3

|   |          |          |          |
|---|----------|----------|----------|
| C | -1.23754 | -0.02919 | -0.00311 |
| C | 0.00000  | 0.65552  | 0.00000  |
| C | 0.00000  | 2.11670  | 0.00001  |
| C | -1.23963 | 2.79922  | 0.00395  |
| C | -2.45818 | 2.11288  | 0.00426  |
| C | 1.23754  | -0.02919 | 0.00310  |
| C | 1.23963  | 2.79922  | -0.00394 |
| C | 2.45818  | 2.11287  | -0.00424 |
| C | 2.46077  | 0.65750  | 0.00413  |
| C | 3.70642  | -0.04281 | 0.01114  |
| H | 3.70172  | -1.13284 | 0.00456  |
| C | 4.92211  | 0.63912  | 0.01054  |
| C | 4.91072  | 2.08831  | -0.00792 |
| C | 3.72696  | 2.78126  | -0.01471 |
| H | 1.23984  | -1.12389 | 0.00552  |
| H | -1.23984 | -1.12389 | -0.00553 |
| H | -1.24168 | 3.89424  | 0.00771  |
| H | 1.24168  | 3.89424  | -0.00769 |

|   |           |          |          |
|---|-----------|----------|----------|
| H | 5.86329   | 2.61565  | -0.00405 |
| H | 3.74110   | 3.87537  | -0.02662 |
| C | -3.72696  | 2.78126  | 0.01473  |
| C | -4.91072  | 2.08831  | 0.00793  |
| H | -5.86329  | 2.61565  | 0.00407  |
| C | -4.92211  | 0.63912  | -0.01054 |
| C | -3.70642  | -0.04281 | -0.01114 |
| H | -3.70172  | -1.13284 | -0.00457 |
| H | -3.74110  | 3.87537  | 0.02664  |
| C | -2.46077  | 0.65750  | -0.00413 |
| C | 8.53252   | -0.56190 | -0.15600 |
| C | 7.76995   | -1.88879 | 0.14348  |
| C | -8.53252  | -0.56190 | 0.15598  |
| C | -7.76995  | -1.88879 | -0.14348 |
| C | 6.18818   | -0.08993 | 0.01263  |
| C | -6.18818  | -0.08993 | -0.01263 |
| N | -7.44227  | 0.46238  | -0.13397 |
| N | -6.33320  | -1.45063 | 0.11295  |
| N | 7.44227   | 0.46238  | 0.13395  |
| N | 6.33320   | -1.45064 | -0.11293 |
| O | 5.41009   | -2.32516 | -0.26443 |
| O | 7.74745   | 1.69176  | 0.31844  |
| O | -7.74745  | 1.69176  | -0.31848 |
| O | -5.41009  | -2.32516 | 0.26445  |
| C | 7.82360   | -2.32037 | 1.62284  |
| H | 7.09551   | -3.12993 | 1.78094  |
| H | 8.82502   | -2.69533 | 1.88329  |
| H | 7.57219   | -1.48910 | 2.29900  |
| C | 9.74517   | -0.27913 | 0.73238  |
| H | 10.53268  | -1.02341 | 0.53528  |
| H | 10.14012  | 0.71942  | 0.49913  |
| H | 9.49547   | -0.30194 | 1.80162  |
| C | 8.11146   | -3.06947 | -0.76660 |
| H | 9.14933   | -3.39079 | -0.58636 |
| H | 7.43997   | -3.90872 | -0.53730 |
| H | 7.99559   | -2.82557 | -1.83115 |
| C | 8.90476   | -0.37429 | -1.64073 |
| H | 9.23737   | 0.66363  | -1.79163 |
| H | 9.72679   | -1.04880 | -1.92434 |
| H | 8.04780   | -0.56412 | -2.30477 |
| C | -8.11146  | -3.06946 | 0.76663  |
| H | -9.14933  | -3.39079 | 0.58638  |
| H | -7.43997  | -3.90871 | 0.53733  |
| H | -7.99560  | -2.82554 | 1.83117  |
| C | -8.90478  | -0.37427 | 1.64071  |
| H | -9.23739  | 0.66365  | 1.79159  |
| H | -9.72681  | -1.04878 | 1.92432  |
| H | -8.04782  | -0.56409 | 2.30476  |
| C | -9.74516  | -0.27914 | -0.73241 |
| H | -10.53267 | -1.02342 | -0.53531 |
| H | -10.14012 | 0.71941  | -0.49917 |
| H | -9.49546  | -0.30197 | -1.80165 |
| C | -7.82359  | -2.32039 | -1.62283 |

|   |          |          |          |
|---|----------|----------|----------|
| H | -7.09550 | -3.12995 | -1.78091 |
| H | -8.82500 | -2.69536 | -1.88328 |
| H | -7.57218 | -1.48913 | -2.29899 |

Diradical-4

|   |           |          |          |
|---|-----------|----------|----------|
| C | 4.86093   | 2.18478  | -0.05209 |
| C | 3.78513   | 3.04241  | -0.08290 |
| C | 2.44149   | 2.55747  | -0.07463 |
| C | 2.23216   | 1.12901  | -0.04569 |
| C | 3.35640   | 0.25618  | -0.02363 |
| C | 4.66100   | 0.75749  | -0.01825 |
| C | 1.31671   | 3.40420  | -0.09120 |
| C | 0.90993   | 0.62559  | -0.03964 |
| C | -0.20977  | 1.46523  | -0.05425 |
| C | 0.00878   | 2.89898  | -0.07927 |
| C | -1.12616  | 3.78734  | -0.08946 |
| H | -0.93815  | 4.86501  | -0.10867 |
| C | -2.40399  | 3.30743  | -0.07340 |
| C | -1.58400  | 0.96023  | -0.04378 |
| H | 1.46564   | 4.48895  | -0.11144 |
| H | 5.87912   | 2.57061  | -0.03649 |
| H | 3.95449   | 4.12312  | -0.10870 |
| H | 3.19554   | -0.82220 | -0.02479 |
| H | 0.78537   | -0.45976 | -0.02002 |
| H | -3.25627  | 3.99310  | -0.07918 |
| C | -1.90586  | -0.41825 | -0.02857 |
| C | -3.21667  | -0.87238 | -0.01571 |
| H | -3.42862  | -1.94006 | -0.00036 |
| C | -4.30505  | 0.05003  | -0.01540 |
| C | -4.00664  | 1.42516  | -0.03383 |
| H | -4.82216  | 2.14816  | -0.04085 |
| H | -1.10872  | -1.16469 | -0.02675 |
| C | -2.67290  | 1.88854  | -0.04952 |
| C | -7.60166  | -1.85607 | -0.18560 |
| C | -8.07233  | -0.44119 | 0.27177  |
| C | 8.06753   | -0.94414 | -0.03550 |
| C | 7.10341   | -2.16184 | 0.11784  |
| C | -5.68922  | -0.42094 | 0.00441  |
| C | 5.80783   | -0.14796 | 0.00909  |
| C | -7.80626  | -2.12818 | -1.68956 |
| H | -7.26516  | -3.04776 | -1.95817 |
| H | -8.87356  | -2.27076 | -1.91710 |
| H | -7.42075  | -1.30458 | -2.30968 |
| C | -9.23287  | 0.15958  | -0.52316 |
| H | -10.14720 | -0.42956 | -0.35036 |
| H | -9.40965  | 1.18941  | -0.18273 |
| H | -9.02963  | 0.18986  | -1.60197 |
| C | -8.13123  | -3.02885 | 0.64123  |
| H | -9.22030  | -3.11918 | 0.50487  |

|   |          |          |          |
|---|----------|----------|----------|
| H | -7.65646 | -3.95795 | 0.29618  |
| H | -7.91633 | -2.91654 | 1.71238  |
| C | -8.34928 | -0.32861 | 1.78464  |
| H | -8.45967 | 0.73526  | 2.04287  |
| H | -9.28077 | -0.85078 | 2.05106  |
| H | -7.52679 | -0.74757 | 2.38413  |
| C | 8.58123  | -0.72789 | -1.47335 |
| H | 9.06603  | 0.25838  | -1.52828 |
| H | 9.32224  | -1.49565 | -1.74294 |
| H | 7.76297  | -0.75380 | -2.20904 |
| C | 7.34266  | -3.32061 | -0.85108 |
| H | 8.30893  | -3.79968 | -0.62828 |
| H | 6.54502  | -4.06657 | -0.72730 |
| H | 7.34171  | -2.99647 | -1.90033 |
| C | 9.23165  | -0.89206 | 0.95506  |
| H | 9.92206  | -1.72824 | 0.76298  |
| H | 9.77847  | 0.05168  | 0.82091  |
| H | 8.89585  | -0.94219 | 1.99944  |
| C | 6.98181  | -2.68997 | 1.56164  |
| H | 6.13301  | -3.38845 | 1.60912  |
| H | 7.89396  | -3.22903 | 1.85946  |
| H | 6.80292  | -1.87612 | 2.28077  |
| O | 7.56968  | 1.37248  | 0.52731  |
| O | 4.73997  | -2.22249 | -0.46777 |
| O | -5.36346 | -2.78374 | 0.02601  |
| O | -6.86483 | 1.65261  | -0.00192 |
| N | -6.09598 | -1.73395 | 0.01653  |
| N | -6.81008 | 0.37349  | 0.01818  |
| N | 5.76553  | -1.50462 | -0.19840 |
| N | 7.11302  | 0.21062  | 0.24414  |

#### Diradical-5

|   |          |         |          |
|---|----------|---------|----------|
| C | 2.21588  | 0.20817 | -0.01702 |
| C | 3.54869  | 0.65461 | -0.00162 |
| C | 3.78765  | 2.05790 | -0.00082 |
| H | 4.81170  | 2.42662 | 0.02303  |
| C | 2.72023  | 2.94039 | -0.01486 |
| C | 1.37006  | 2.50831 | -0.02593 |
| C | 1.12220  | 1.10217 | -0.02660 |
| H | 2.94863  | 4.00708 | -0.01216 |
| C | 0.25092  | 3.45422 | -0.03416 |
| C | -1.09308 | 2.96843 | -0.03034 |
| C | -1.34917 | 1.52035 | -0.02559 |
| C | -0.25655 | 0.60286 | -0.03512 |
| C | 0.46619  | 4.85658 | -0.04552 |
| C | -0.59039 | 5.75857 | -0.05155 |
| H | -0.39124 | 6.83329 | -0.06073 |
| C | -1.91334 | 5.27954 | -0.04682 |
| H | -2.75384 | 5.97838 | -0.05224 |

|   |          |          |          |
|---|----------|----------|----------|
| C | -2.15282 | 3.91026  | -0.03652 |
| H | -3.18733 | 3.56430  | -0.03568 |
| H | 1.48411  | 5.24872  | -0.05040 |
| C | -2.66914 | 1.01808  | -0.01666 |
| C | -2.94716 | -0.36072 | -0.02297 |
| C | -1.85002 | -1.26765 | -0.04471 |
| H | -2.04031 | -2.33926 | -0.05063 |
| C | -0.55250 | -0.78343 | -0.04945 |
| H | -3.51719 | 1.69772  | -0.00927 |
| H | 0.25868  | -1.51280 | -0.06589 |
| H | 2.04838  | -0.86563 | -0.03040 |
| C | 6.87574  | -1.19830 | -0.11302 |
| C | 5.87183  | -2.36079 | 0.16376  |
| C | -6.22243 | -2.30278 | -0.20625 |
| C | -6.71026 | -0.89567 | 0.25699  |
| C | 4.65574  | -0.30034 | 0.01022  |
| C | -4.32729 | -0.84496 | -0.00764 |
| N | -4.71859 | -2.16303 | -0.00241 |
| N | -5.45796 | -0.06490 | 0.00869  |
| N | 4.54641  | -1.66359 | -0.11421 |
| N | 5.98674  | 0.01212  | 0.14752  |
| C | -6.42306 | -2.57103 | -1.71142 |
| H | -5.87083 | -3.48291 | -1.98363 |
| H | -7.48847 | -2.72554 | -1.93998 |
| H | -6.04720 | -1.74038 | -2.32802 |
| C | -7.87727 | -0.30563 | -0.53667 |
| H | -8.78405 | -0.90773 | -0.36874 |
| H | -8.06820 | 0.71987  | -0.19098 |
| H | -7.67248 | -0.26687 | -1.61490 |
| C | -6.73788 | -3.48550 | 0.61534  |
| H | -7.82549 | -3.58972 | 0.47716  |
| H | -6.25041 | -4.40690 | 0.26737  |
| H | -6.52575 | -3.37468 | 1.68720  |
| C | -6.99074 | -0.79391 | 1.77001  |
| H | -7.11560 | 0.26707  | 2.03335  |
| H | -7.91554 | -1.32981 | 2.03240  |
| H | -6.16360 | -1.20496 | 2.36853  |
| C | 7.31811  | -1.08641 | -1.58578 |
| H | 7.84563  | -0.13044 | -1.72214 |
| H | 8.00508  | -1.90457 | -1.85001 |
| H | 6.45949  | -1.11051 | -2.27388 |
| C | 6.00476  | -3.58146 | -0.74863 |
| H | 6.96738  | -4.08310 | -0.56221 |
| H | 5.19310  | -4.28867 | -0.52798 |
| H | 5.94323  | -3.31738 | -1.81288 |
| C | 8.09307  | -1.14373 | 0.81084  |
| H | 8.73851  | -2.01678 | 0.62697  |
| H | 8.66817  | -0.23169 | 0.59822  |
| H | 7.81208  | -1.12744 | 1.87223  |
| C | 5.81308  | -2.80334 | 1.63999  |
| H | 4.94061  | -3.46003 | 1.77435  |
| H | 6.71816  | -3.36518 | 1.91616  |
| H | 5.70894  | -1.94489 | 2.32089  |

|   |          |          |          |
|---|----------|----------|----------|
| O | -3.97358 | -3.20350 | 0.00443  |
| O | -5.53091 | 1.21462  | -0.00564 |
| O | 6.50767  | 1.16912  | 0.31603  |
| O | 3.47974  | -2.35375 | -0.27994 |

Diradical-6

|   |          |          |          |
|---|----------|----------|----------|
| C | 4.82670  | 2.34884  | -0.03693 |
| C | 3.76128  | 3.22727  | -0.05994 |
| C | 2.41553  | 2.77306  | -0.05991 |
| C | 2.15571  | 1.36262  | -0.04496 |
| C | 3.25860  | 0.47514  | -0.02605 |
| C | 4.58486  | 0.93879  | -0.01715 |
| C | 1.31778  | 3.68600  | -0.07254 |
| C | 0.77712  | 0.88990  | -0.04918 |
| C | -0.29216 | 1.83486  | -0.05205 |
| C | 0.02107  | 3.23401  | -0.06612 |
| C | -1.66782 | 1.36684  | -0.04366 |
| C | -1.93284 | -0.04222 | -0.04242 |
| C | -0.83164 | -0.95707 | -0.04839 |
| C | 0.46531  | -0.50951 | -0.05006 |
| H | 1.52693  | 4.75983  | -0.08579 |
| H | 5.85277  | 2.71230  | -0.01947 |
| H | 3.94987  | 4.30506  | -0.07351 |
| H | -0.78885 | 3.96535  | -0.07473 |
| H | -1.04411 | -2.03003 | -0.05106 |
| C | -3.26376 | -0.52507 | -0.03335 |
| C | -4.35808 | 0.35266  | -0.02257 |
| C | -4.09296 | 1.75909  | -0.02262 |
| H | -4.93212 | 2.45269  | -0.01825 |
| C | -2.79352 | 2.23452  | -0.03358 |
| H | -2.65071 | 3.31664  | -0.03308 |
| H | 1.27380  | -1.24210 | -0.05643 |
| H | -3.43913 | -1.60063 | -0.02668 |
| H | 3.10328  | -0.60099 | -0.02892 |
| C | 7.92624  | -0.89240 | -0.08622 |
| C | 6.92634  | -2.06230 | 0.17059  |
| C | -8.11138 | -0.24307 | 0.26104  |
| C | -7.59977 | -1.64520 | -0.19213 |
| C | -5.72988 | -0.15407 | -0.00485 |
| C | 5.69864  | -0.00914 | 0.00739  |
| N | 5.60137  | -1.37272 | -0.12694 |
| N | 7.02571  | 0.31054  | 0.16900  |
| N | -6.09877 | -1.47744 | 0.00942  |
| N | -6.87353 | 0.60837  | 0.00504  |
| O | 4.54293  | -2.07006 | -0.31565 |
| O | 7.53749  | 1.46826  | 0.35875  |
| O | -6.96842 | 1.88475  | -0.02423 |
| O | -5.33376 | -2.50423 | 0.01891  |



|   |           |          |          |
|---|-----------|----------|----------|
| C | 6.84649   | -2.50935 | 1.64448  |
| H | 5.97482   | -3.17000 | 1.76359  |
| H | 7.74947   | -3.06816 | 1.93346  |
| H | 6.72839   | -1.65291 | 2.32567  |
| C | 9.13091   | -0.83488 | 0.85390  |
| H | 9.78423   | -1.70296 | 0.67431  |
| H | 9.70301   | 0.08173  | 0.65337  |
| H | 8.83607   | -0.82547 | 1.91162  |
| C | 7.08281   | -3.27912 | -0.74326 |
| H | 8.04773   | -3.77189 | -0.54548 |
| H | 6.27537   | -3.99507 | -0.53568 |
| H | 7.03283   | -3.01278 | -1.80758 |
| C | 8.38701   | -0.77031 | -1.55246 |
| H | 8.91008   | 0.18965  | -1.67751 |
| H | 9.08263   | -1.58274 | -1.81170 |
| H | 7.53747   | -0.79660 | -2.25167 |
| C | -9.28906  | 0.32137  | -0.53532 |
| H | -10.18621 | -0.29284 | -0.35968 |
| H | -9.49467  | 1.34710  | -0.19881 |
| H | -9.08715  | 0.35334  | -1.61431 |
| C | -7.79728  | -1.92786 | -1.69495 |
| H | -7.22917  | -2.83161 | -1.96157 |
| H | -8.86002  | -2.10305 | -1.92085 |
| H | -7.43716  | -1.09494 | -2.31789 |
| C | -8.39139  | -0.13439 | 1.77363  |
| H | -8.53535  | 0.92623  | 2.02860  |
| H | -9.30585  | -0.68496 | 2.04179  |
| H | -7.55598  | -0.52547 | 2.37405  |
| C | -8.09393  | -2.83035 | 0.63902  |
| H | -9.17950  | -2.95515 | 0.50196  |
| H | -7.59000  | -3.74560 | 0.29829  |
| H | -7.88371  | -2.70698 | 1.70989  |

#### Diradical-7

|   |          |          |          |
|---|----------|----------|----------|
| C | -3.88307 | 0.20749  | -0.08587 |
| C | -3.75150 | 1.57360  | 0.20339  |
| C | -2.48937 | 2.21454  | 0.18874  |
| C | -1.28713 | 1.46133  | -0.05526 |
| C | -1.46409 | 0.10138  | -0.44054 |
| C | -2.70513 | -0.51169 | -0.45788 |
| H | -3.34024 | 4.19103  | 0.53643  |
| H | -4.64320 | 2.16531  | 0.41022  |
| C | -2.41667 | 3.63688  | 0.34692  |
| C | -0.00001 | 2.13720  | -0.00008 |
| H | -0.60696 | -0.47505 | -0.78743 |
| H | -2.79543 | -1.55367 | -0.76087 |
| C | -0.00004 | 3.56580  | 0.00002  |
| C | -1.22202 | 4.28928  | 0.19295  |
| H | -1.17484 | 5.38147  | 0.23522  |

|   |          |          |          |
|---|----------|----------|----------|
| C | 1.22191  | 4.28936  | -0.19279 |
| C | 2.41660  | 3.63704  | -0.34681 |
| C | 2.48937  | 2.21468  | -0.18881 |
| C | 1.28715  | 1.46138  | 0.05503  |
| C | 1.46416  | 0.10138  | 0.44012  |
| C | 2.70523  | -0.51162 | 0.45745  |
| C | 3.88316  | 0.20767  | 0.08565  |
| C | 3.75153  | 1.57381  | -0.20346 |
| H | 2.79557  | -1.55364 | 0.76031  |
| H | 0.60703  | -0.47515 | 0.78686  |
| H | 4.64321  | 2.16560  | -0.41016 |
| H | 1.17468  | 5.38155  | -0.23492 |
| H | 3.34015  | 4.19125  | -0.53621 |
| C | 6.90905  | -2.08720 | 0.37765  |
| C | 7.52106  | -0.84039 | -0.33332 |
| C | -7.52097 | -0.84025 | 0.33352  |
| C | -6.90921 | -2.08714 | -0.37755 |
| C | 5.18916  | -0.44736 | 0.06138  |
| C | -5.18908 | -0.44751 | -0.06153 |
| N | -6.39682 | 0.17149  | 0.14764  |
| N | -5.42041 | -1.79040 | -0.23935 |
| N | 5.42030  | -1.79027 | 0.23925  |
| N | 6.39700  | 0.17150  | -0.14765 |
| O | 4.55791  | -2.71688 | 0.42800  |
| O | 6.61538  | 1.41891  | -0.33849 |
| O | -6.61495 | 1.41894  | 0.33854  |
| O | -4.55818 | -2.71717 | -0.42810 |
| C | 7.18726  | -2.14694 | 1.89327  |
| H | 6.54365  | -2.92081 | 2.33780  |
| H | 8.23732  | -2.41367 | 2.08717  |
| H | 6.96978  | -1.18798 | 2.38771  |
| C | 8.80684  | -0.28939 | 0.28513  |
| H | 9.62542  | -1.01423 | 0.15315  |
| H | 9.08024  | 0.64467  | -0.22525 |
| H | 8.69628  | -0.07050 | 1.35555  |
| C | 7.22065  | -3.43705 | -0.27044 |
| H | 8.29800  | -3.64951 | -0.18742 |
| H | 6.66592  | -4.22751 | 0.25401  |
| H | 6.93371  | -3.46869 | -1.33001 |
| C | 7.69209  | -1.00659 | -1.85677 |
| H | 7.92216  | -0.02312 | -2.29318 |
| H | 8.52265  | -1.69196 | -2.08372 |
| H | 6.77714  | -1.39154 | -2.33213 |
| C | -8.80679 | -0.28911 | -0.28470 |
| H | -9.62543 | -1.01386 | -0.15260 |
| H | -9.08000 | 0.64498  | 0.22573  |
| H | -8.69640 | -0.07021 | -1.35515 |
| C | -7.18764 | -2.14682 | -1.89314 |
| H | -6.54425 | -2.92082 | -2.33776 |
| H | -8.23779 | -2.41334 | -2.08689 |
| H | -6.97004 | -1.18790 | -2.38760 |
| C | -7.69174 | -1.00643 | 1.85699  |
| H | -7.92163 | -0.02294 | 2.29344  |

|   |          |          |          |
|---|----------|----------|----------|
| H | -8.52234 | -1.69171 | 2.08410  |
| H | -6.77675 | -1.39148 | 2.33219  |
| C | -7.22090 | -3.43696 | 0.27056  |
| H | -8.29830 | -3.64928 | 0.18768  |
| H | -6.66634 | -4.22749 | -0.25397 |
| H | -6.93383 | -3.46865 | 1.33010  |
